# Supplementary material for: Early immune markers of clinical, virological, and immunological outcomes in patients with COVID-19: a multi-omics study
Source: eLife. 2022 Oct 14;11:e77943. doi: 10.7554/eLife.77943 (PMC9566856; doi:10.7554/eLife.77943)
Supplement: Supplementary file 2. [file elife-77943-supp2.csv]

gene	overall_p_value_linear_regression	quadratic_p_value_linear_regression	overall_FDR_linear_regression	overall_p_value_mixed_model	overall_FDR_mixed_model
GO_activated dendritic cells (M67)	1.15E-08	0.185913246	4.97E-07	6.35E-09	1.64E-07
GO_antiviral IFN signature (M75)	6.98E-09	0.636229983	3.62E-07	2.90E-09	8.90E-08
GO_ATF targets network (M41.4)	0.021457105	0.116548052	0.097498074	0.019730054	0.074717232
GO_axon guidance (M110)	0.169151726	0.175002812	0.326942516	0.184828931	0.294244427
GO_B cell development (M9)	0.224607145	0.234632648	0.370530258	0.125149589	0.226669535
GO_B cell development/activation (M58)	0.40716136	0.204470175	0.524650707	0.49779884	0.567973125
GO_B cell surface signature (S2)	0.008725565	0.075417326	0.064569178	0.008056696	0.041733688
GO_BCR signaling (M54)	0.246079202	0.112050514	0.393422921	0.236853709	0.342710115
GO_blood coagulation (M11.1)	0.473689671	0.224140251	0.593531076	0.400390606	0.489156448
GO_CCR1, 7 and cell signaling (M59)	0.104581065	0.152998336	0.231508512	0.072329606	0.159217721
GO_CD1 and other DC receptors (M50)	6.56E-05	0.858654021	0.001062512	9.84E-06	0.000134134
GO_CD28 costimulation (M12)	0.111217017	0.682620236	0.239845535	0.005420722	0.031908338
GO_cell adhesion (GO) (M117)	0.571874236	0.301181081	0.667186608	0.390115	0.47886154
GO_cell adhesion (M51)	0.003394515	0.752499535	0.033814588	0.001235221	0.010320072
GO_cell adhesion, membrane (M133.0)	0.33524784	0.191540202	0.466823605	0.273076906	0.368701277
GO_cell cell adhesion (M133.1)	0.344075618	0.313236836	0.468331638	0.340211107	0.43193469
GO_cell cycle (I) (M4.1)	0.18591125	0.143187232	0.338805081	0.094547729	0.188104466
GO_cell cycle (II) (M4.10)	0.106472709	0.073162804	0.233698574	0.063498369	0.150881446
GO_cell cycle (III) (M103)	0.07692727	0.047362425	0.197373828	0.04285674	0.115623914
GO_cell cycle and growth arrest (M31)	0.293251681	0.418953376	0.435240595	0.139909065	0.246506447
GO_cell cycle and transcription (M4.0)	0.141010529	0.058056548	0.283114162	0.090617061	0.184801722
GO_cell cycle, ATP binding (M144)	0.187062265	0.667873391	0.338805081	0.185180856	0.294244427
GO_cell cycle, mitotic phase (M230)	0.662937009	0.423458465	0.736912812	0.670105145	0.723155136
GO_cell development (M175)	0.242458501	0.175626164	0.392479699	0.252265517	0.355091135
GO_cell division (M37.3)	0.25757714	0.191759169	0.39709809	0.197086	0.30606557
GO_cell junction (GO) (M4.13)	0.204457169	0.21814948	0.357800046	0.070709266	0.159217721
GO_cell junction (M162.1)	0.099051874	0.034492084	0.225919518	0.095141641	0.188104466
GO_chemokine cluster (I) (M27.0)	0.049230453	0.151083075	0.157415894	0.056057402	0.140666922
GO_chemokine cluster (II) (M27.1)	1.77E-05	0.508916446	0.00030506	2.67E-07	4.61E-06
GO_chemokines and receptors (M38)	0.002661083	0.074158683	0.028717523	0.001211855	0.010320072
GO_chromosome Y linked (M240)	0.680552646	0.425966849	0.746877692	0.197347298	0.30606557
GO_collagen, TGFB family et al (M77)	0.112051389	0.427077888	0.239845535	0.119499993	0.221074987
GO_complement activation (I) (M112.0)	0.030831956	0.632893459	0.115731547	0.000183057	0.00182353
GO_complement activation (II) (M112.1)	0.096296368	0.207393545	0.225919518	0.112354094	0.212406646
GO_CORO1A-DEF6 network (I) (M32.2)	0.339163102	0.322421626	0.468331638	0.286367221	0.382315001
GO_CORO1A-DEF6 network (II) (M32.4)	0.646434147	0.387234406	0.721665707	0.600376868	0.661691953
GO_cytokines - recepters cluster (M115)	0.025379641	0.051887416	0.110066781	0.014871091	0.061459641
GO_cytoskeletal remodeling (M32.8)	0.041591607	0.155069238	0.14173982	0.032257911	0.100200051
GO_DC surface signature (S5)	0.873887227	0.759726495	0.901740207	0.333494901	0.431321854
GO_DNA repair (M76)	0.354747746	0.19134072	0.476060447	0.377913042	0.46832286
GO_double positive thymocytes (M126)	0.176870186	0.790634059	0.331952016	0.359981984	0.454806507
GO_E2F1 targets (Q3) (M10.0)	0.071275601	0.050777286	0.192295632	0.025498092	0.091600771
GO_E2F1 targets (Q4) (M10.1)	0.128295545	0.065146734	0.26582837	0.07039755	0.159217721
GO_endoplasmic reticulum (M37.2)	0.510756031	0.26921552	0.623989679	0.232365463	0.338104803
GO_enriched for cell migration (M122)	0.174060929	0.094343409	0.331483681	0.167892917	0.274468804
GO_enriched for SMAD2/3 signaling (M97)	0.029218304	0.565289657	0.115029361	0.041228466	0.113191778
GO_enriched for TF motif PAX3 (M179)	0.369376742	0.698640736	0.488104981	0.520525529	0.586157009
GO_enriched for ubiquitination (M138)	0.029771779	0.610590344	0.115029361	0.028871481	0.095868124
GO_enriched in B cells (I) (M47.0)	0.09144084	0.950180441	0.219288681	0.001368517	0.010740789
GO_enriched in B cells (II) (M47.1)	0.016943792	0.310363074	0.086047885	0.00013444	0.001392799
GO_enriched in B cells (III) (M47.2)	1.61E-06	0.000560023	3.48E-05	7.73E-11	5.01E-09
GO_enriched in B cells (IV) (M47.3)	5.65E-08	0.00010447	1.83E-06	5.13E-13	1.33E-10
GO_enriched in B cells (V) (M47.4)	0.096840243	0.202997616	0.225919518	0.006445166	0.034510653
GO_enriched in B cells (VI) (M69)	0.253871536	0.578032907	0.39709809	0.010403444	0.04811593
GO_enriched in cell cycle (M167)	0.11866402	0.320746924	0.248760116	0.084931876	0.17995879
GO_enriched in dendritic cells (M168)	0.687418469	0.485014384	0.751229466	0.643294517	0.697126694
GO_enriched in membrane proteins (M124)	0.38128942	0.971543356	0.493769799	0.02442863	0.089112888
GO_enriched in monocytes (I) (M4.15)	0.608016508	0.729282702	0.687669326	0.316963083	0.414613325
GO_enriched in monocytes (II) (M11.0)	0.303411833	0.250039302	0.441202134	0.205626517	0.314957062
GO_enriched in monocytes (III) (M73)	0.015430265	0.222163659	0.082525786	0.005154371	0.031487061
GO_enriched in monocytes (IV) (M118.0)	0.374758877	0.179437811	0.492703295	0.257094065	0.356082154
GO_enriched in neutrophils (I) (M37.1)	0.218234918	0.174843329	0.364663508	0.128993383	0.230408871
GO_enriched in neutrophils (II) (M163)	0.713695951	0.61650379	0.773419462	0.493809103	0.565913973
GO_enriched in NK cells (I) (M7.2)	0.101878057	0.105189569	0.227493477	0.0892417	0.184801722
GO_enriched in NK cells (II) (M61.0)	0.19834924	0.135750424	0.351866117	0.255690431	0.356082154
GO_enriched in NK cells (III) (M157)	0.06780867	0.1320449	0.185886087	0.052416017	0.133095573
GO_enriched in T cells (I) (M7.0)	0.778281222	0.647127521	0.822754435	0.771328995	0.815404937
GO_enriched in T cells (II) (M223)	0.985864521	0.884409912	0.989052476	0.881960594	0.902876655
GO_erythrocyte differentiation (M173)	0.027635811	0.040305175	0.114119822	0.037138535	0.108077309
GO_extracellular matrix (I) (M2.0)	0.011333262	0.204103965	0.069888449	0.011163013	0.050723163
GO_extracellular matrix (II) (M2.1)	0.016075911	0.912500584	0.083273217	0.012422416	0.055472511
GO_extracellular matrix (III) (M2.2)	0.023311408	0.131788182	0.104097493	0.026629509	0.093203282
GO_golgi membrane (I) (M113)	0.064321581	0.08869893	0.181079232	0.089931995	0.184801722
GO_golgi membrane (II) (M237)	0.21400764	0.58903464	0.35992194	0.121785926	0.222130668
GO_heme biosynthesis (I) (M171)	0.196994093	0.089684552	0.351866117	0.263849516	0.361571559
GO_heme biosynthesis (II) (M222)	0.298729393	0.124530975	0.437123801	0.385144758	0.475011869
GO_Hox cluster I (M17.0)	0.084702124	0.364459909	0.206960851	0.116064432	0.216263942
GO_Hox cluster II (M17.1)	0.063595443	0.286864078	0.181079232	0.059591378	0.146549669
GO_Hox cluster III (M17.2)	0.028199493	0.343239535	0.114119822	0.036561268	0.107606461
GO_Hox cluster IV (M17.3)	0.208156286	0.285030685	0.35992194	0.224813418	0.330833382
GO_Hox cluster V (M96)	0.068092062	0.226782206	0.185886087	0.10225356	0.200633879
GO_Hox cluster VI (M107)	0.057261309	0.405887962	0.176555702	0.060543686	0.146549669
GO_IL2, IL7, TCR network (M65)	0.891175927	0.774908565	0.907063985	0.994142414	0.994142414
GO_inflammatory response (M33)	0.183305468	0.463042581	0.338805081	0.144709579	0.249865207
GO_innate antiviral response (M150)	7.22E-10	0.563884565	9.36E-08	3.62E-10	1.56E-08
GO_inositol phosphate metabolism (M129)	0.085859306	0.57754654	0.207827667	0.040458726	0.113191778
GO_integrins and cell adhesion (M84)	0.773457181	0.474256838	0.821005779	0.535792413	0.600736948
GO_intracellular transport (M147)	0.534865312	0.374536033	0.64432612	0.430414833	0.51372093
GO_KLF12 targets network (M32.3)	0.580903658	0.431926851	0.668684655	0.573304595	0.637278499
GO_leukocyte differentiation (M160)	0.356870766	0.762699333	0.476440867	0.141094004	0.246914507
GO_leukocyte migration (M88.0)	0.129961586	0.191683598	0.267143261	0.138996683	0.246506447
GO_lymphocyte generic cluster (M60)	0.474366536	0.478415863	0.593531076	0.209380378	0.315287894
GO_lysosomal/endosomal proteins (M139)	0.244331243	0.139743225	0.393054609	0.208123849	0.31522852
GO_lysosome (M209)	0.138433578	0.079022589	0.280111693	0.061954217	0.14857539
GO_MAPK, RAS signaling (M100)	0.343563657	0.379167392	0.468331638	0.334701004	0.431321854
GO_Membrane, ER proteins (M134)	0.335129022	0.237684626	0.466823605	0.297423281	0.393023622
GO_Memory B cell surface signature (S9)	0.003693351	0.228844228	0.035428814	0.003366673	0.022358161
GO_metabolism of steroids (M225)	0.01465938	0.281361386	0.082525786	0.014022058	0.059601361
GO_MHC-TLR7-TLR8 cluster (M146)	0.437750869	0.289954262	0.555771937	0.120593612	0.221515926
GO_mismatch repair (I) (M22.0)	0.380935857	0.171963505	0.493769799	0.299094122	0.393225266
GO_mismatch repair (II) (M22.1)	0.34718021	0.173031437	0.468331638	0.273322955	0.368701277
GO_mitochondrial cluster (M235)	0.759265944	0.473260782	0.809258763	0.80964405	0.838791236
GO_mitotic cell cycle (M4.7)	0.084589561	0.118840783	0.206960851	0.064872533	0.151369244
GO_mitotic cell division (M6)	0.329174189	0.24510464	0.465880409	0.256778404	0.356082154
GO_Monocyte surface signature (S4)	0.558836747	0.283991064	0.660907386	0.472783142	0.551580332
GO_Naive B cell surface signature (S8)	0.0204875	0.10630448	0.09475469	0.019905363	0.074717232
GO_NK cell surface signature (S1)	0.042341068	0.055419485	0.142419955	0.002909238	0.020212079
GO_nuclear pore complex (M106.0)	0.01085994	0.88619923	0.069206156	0.008458907	0.042131864
GO_nucleotide metabolism (M181)	0.05056282	0.0582006	0.158876659	0.044165012	0.117732241
GO_olfactory receptors (M228)	0.223635006	0.288101622	0.370530258	0.216002234	0.321520567
GO_Plasma cell surface signature (S3)	0.004375294	0.612810163	0.039006093	0.002764355	0.020212079
GO_platelet activation (I) (M32.0)	0.113660743	0.103565325	0.241296167	0.107824189	0.208406454
GO_platelet activation (II) (M32.1)	0.197972624	0.206361886	0.351866117	0.190350114	0.3006139
GO_platelet activation (III) (M42)	0.543102626	0.270431226	0.648219264	0.506340889	0.575185484
GO_PLK1 signaling events (M4.2)	0.211206077	0.204202731	0.35992194	0.106397514	0.20719516
GO_proteasome (M226)	0.030200759	0.612837915	0.115029361	0.034808332	0.104541477
GO_putative targets of PAX3 (M89.0)	0.154285911	0.257955126	0.30468766	0.014949642	0.061459641
GO_putative targets of PAX3 (M89.1)	0.019973165	0.236615288	0.09475469	0.001115237	0.009960222
GO_Ran mediated mitosis (M15)	0.235618398	0.142687418	0.386235223	0.152150696	0.25534699
GO_receptors, cell migration (M109)	0.015612986	0.091047804	0.082525786	0.006015882	0.033872032
GO_recruitment of neutrophils (M132)	0.321939267	0.173818341	0.463095703	0.152813835	0.25534699
GO_Rho GTPase cycle (M4.14)	0.152030964	0.17326346	0.302892459	0.035116249	0.104541477
GO_RIG-1 like receptor signaling (M68)	3.29E-09	0.923194747	2.84E-07	1.04E-09	3.84E-08
GO_signaling in T cells (I) (M35.0)	0.00201123	0.035786443	0.023677666	8.83E-05	0.001088435
GO_signaling in T cells (II) (M35.1)	0.093033368	0.092287863	0.221060938	0.087011241	0.181741221
GO_spliceosome (M250)	0.578860552	0.798704673	0.668684655	0.87794311	0.902330418
GO_suppression of MAPK signaling (M56)	0.540104824	0.383321347	0.647625692	0.427782163	0.512942501
GO_T cell activation (I) (M7.1)	0.974747769	0.833631619	0.982333355	0.723640768	0.771287897
GO_T cell activation (II) (M7.3)	0.276358882	0.23011055	0.418578658	0.297137202	0.393023622
GO_T cell activation (III) (M7.4)	0.989052476	0.903800639	0.989052476	0.776952981	0.818011472
GO_T cell activation (IV) (M52)	0.031958597	0.20160902	0.118246809	0.019307646	0.074637021
GO_T cell differentiation (M14)	0.6738979	0.47730571	0.742721516	0.557903363	0.622831772
GO_T cell differentiation (Th2) (M19)	0.893055275	0.654688417	0.907063985	0.674983596	0.725397309
GO_T cell surface signature (S0)	0.698811969	0.691214299	0.760471849	0.966453138	0.977778761
GO_T cell surface, activation (M36)	0.912892565	0.697624332	0.923590525	0.887779384	0.905255356
GO_targets of FOSL1/2 (M0)	0.238197596	0.30489249	0.388007405	0.280426627	0.376323815
GO_TLR and inflammatory signaling (M16)	0.454845628	0.301102254	0.574658623	0.338063074	0.431321854
GO_TLR8-BAFF network (M25)	0.620837403	0.450367308	0.699116902	0.439478223	0.522132384
GO_translation initiation (M227)	0.409928679	0.300880116	0.525601624	0.468428832	0.548973156
GO_transmembrane transport (I) (M87)	0.832652497	0.970124498	0.862627987	0.477535253	0.554626146
GO_transmembrane transport (II) (M191)	0.005752565	0.038396664	0.046559819	0.005227582	0.031487061
GO_type I interferon response (M127)	5.94E-10	0.646846457	9.36E-08	3.11E-10	1.56E-08
GO_Wnt signaling pathway (M206)	0.007142249	0.315264007	0.054407128	0.006529042	0.034510653
GO_xenobiotic metabolism (M164)	0.075901581	0.0399878	0.197373828	0.072539348	0.159217721
olink_IL8_P10145_OID00471	0.168255613	0.389623853	0.622833141	0.001622974	0.011485662
olink_VEGFA_P15692_OID00472	0.447402933	0.999505427	0.898689985	0.060079676	0.197404649
olink_CD8A_P01732_OID05124	0.679423945	0.569502119	0.940820948	0.354596198	0.609071027
olink_MCP-3_P80098_OID00474	0.381778528	0.251700489	0.893204142	0.04170646	0.143841923
olink_GDNF_P39905_OID00475	0.499773817	0.35424261	0.908705263	0.534971955	0.716389936
olink_CDCP1_Q9H5V8_OID00476	0.761860441	0.979155778	0.940820948	0.591111272	0.754812605
olink_CD244_Q9BZW8_OID00477	0.063652526	0.057829714	0.39040216	0.021365986	0.089348671
olink_IL7_P13232_OID00478	0.854088974	0.605863159	0.950259614	0.958176906	0.964104468
olink_OPG_O00300_OID00479	0.011490419	0.591752109	0.139555349	9.69E-08	3.57E-06
olink_LAP TGF-beta-1_P01137_OID00480	0.179853383	0.087247175	0.634389125	0.172064273	0.400757295
olink_uPA_P00749_OID00481	0.502101912	0.520078586	0.908705263	0.00148466	0.010927098
olink_IL6_P05231_OID00482	0.022676144	0.049612106	0.184739393	0.000342351	0.003315401
olink_IL-17C_Q9P0M4_OID00483	0.921080498	0.69758928	0.96671098	0.846006227	0.935918804
olink_MCP-1_P13500_OID00484	0.001493071	0.701763909	0.030525007	7.86E-06	0.00018079
olink_IL-17A_Q16552_OID00485	0.774625395	0.485141289	0.943914388	0.679353869	0.817000731
olink_CXCL11_O14625_OID00486	8.02E-06	0.867682589	0.000738137	2.89E-11	2.66E-09
olink_AXIN1_O15169_OID00487	0.346107071	0.827218258	0.837943434	0.480883606	0.705029418
olink_TRAIL_P50591_OID00488	0.003276674	0.151548001	0.060290804	0.002691013	0.018338757
olink_IL-20RA_Q9UHF4_OID00489	0.069935231	0.106132909	0.399766379	0.096013707	0.278367267
olink_CXCL9_Q07325_OID00490	0.488719709	0.604888288	0.908705263	0.015572494	0.077441591
olink_CST5_P28325_OID00491	0.3260123	0.612538871	0.819161739	0.038103582	0.137471746
olink_IL-2RB_P14784_OID00492	0.292304458	0.190342595	0.790941474	0.235776772	0.48286066
olink_IL-1 alpha_P01583_OID00493	0.856450343	0.912608259	0.950259614	0.843814397	0.935918804
olink_OSM_P13725_OID00494	0.754302093	0.509714594	0.940820948	0.40009145	0.655184761
olink_IL2_P60568_OID00495	0.743815215	0.442849217	0.940820948	0.717502496	0.846284996
olink_CXCL1_P09341_OID00496	0.000329132	0.048993445	0.010093379	1.29E-05	0.000264382
olink_TSLP_Q969D9_OID00497	0.972283185	0.822752875	0.988398376	0.782460709	0.89424081
olink_CCL4_P13236_OID00498	0.719881377	0.56522529	0.940820948	0.382250789	0.639401319
olink_CD6_P30203_OID00499	0.635043234	0.341449912	0.940820948	0.389530176	0.645707679
olink_SCF_P21583_OID00500	0.006995162	0.231718299	0.091936412	2.55E-07	7.81E-06
olink_IL18_Q14116_OID00501	0.692840793	0.828814655	0.940820948	0.883520996	0.939698632
olink_SLAMF1_Q13291_OID00502	0.478282644	0.519161209	0.908705263	0.275525218	0.533648843
olink_TGF-alpha_P01135_OID00503	0.383728333	0.979558555	0.893204142	0.240111628	0.483111122
olink_MCP-4_Q99616_OID00504	0.628231301	0.455079088	0.940820948	0.76569374	0.884446303
olink_CCL11_P51671_OID00505	0.539448295	0.754784394	0.910803243	0.020608231	0.088184056
olink_TNFSF14_O43557_OID00506	0.81214391	0.681152514	0.94751853	0.345469783	0.605394667
olink_FGF-23_Q9GZV9_OID00507	0.08449445	0.048286658	0.431860522	0.107221763	0.297070267
olink_IL-10RA_Q13651_OID00508	0.094688411	0.153900723	0.467869452	0.232390965	0.48286066
olink_FGF-5_P12034_OID00509	0.583493438	0.982331561	0.940820948	0.598177591	0.754812605
olink_MMP-1_P03956_OID00510	0.30207418	0.41522066	0.794023559	0.059838777	0.197404649
olink_LIF-R_P42702_OID00511	0.684466427	0.396637027	0.940820948	0.666174553	0.806421827
olink_FGF-21_Q9NSA1_OID00512	0.455866924	0.688098306	0.898689985	0.937146599	0.959357802
olink_CCL19_Q99731_OID00513	0.003950957	0.987394231	0.066088738	8.40E-09	3.86E-07
olink_IL-15RA_Q13261_OID00514	0.103755246	0.869094388	0.481733473	0.096823397	0.278367267
olink_IL-10RB_Q08334_OID00515	0.041870404	0.055297095	0.285339053	0.035238431	0.132265641
olink_IL-22 RA1_Q8N6P7_OID00516	0.558216479	0.713740365	0.925331822	0.325286556	0.587858347
olink_IL-18R1_Q13478_OID00517	0.807187564	0.727317458	0.94751853	0.289196142	0.542980511
olink_PD-L1_Q9NZQ7_OID00518	0.811701406	0.567573603	0.94751853	0.662194125	0.806421827
olink_Beta-NGF_P01138_OID00519	0.929933932	0.752023265	0.96671098	0.928192287	0.959357802
olink_CXCL5_P42830_OID00520	0.034298653	0.144280511	0.252438084	0.03961599	0.140179657
olink_TRANCE_O14788_OID00521	0.189627184	0.817386866	0.634389125	0.017394007	0.078730961
olink_HGF_P14210_OID00522	0.970209358	0.807999558	0.988398376	0.717458082	0.846284996
olink_IL-12B_P29460_OID00523	0.427250943	0.228135042	0.898689985	0.357087658	0.609071027
olink_IL-24_Q13007_OID00524	0.666874376	0.5814826	0.940820948	0.610550583	0.76422658
olink_IL13_P35225_OID00525	0.808335928	0.595854292	0.94751853	0.598927393	0.754812605
olink_ARTN_Q5T4W7_OID00526	0.812199737	0.655219344	0.94751853	0.942031006	0.959357802
olink_MMP-10_P09238_OID00527	0.861854733	0.623149084	0.950259614	0.468960842	0.705029418
olink_IL10_P22301_OID00528	0.186202608	0.539332403	0.634389125	0.183533997	0.406870548
olink_TNF_P01375_OID05548	0.297279947	0.960706809	0.792746526	0.023350868	0.095479107
olink_CCL23_P55773_OID00530	0.925593081	0.747568805	0.96671098	0.307816122	0.572102692
olink_CD5_P06127_OID00531	0.013145917	0.462084667	0.139555349	2.84E-05	0.00047499
olink_CCL3_P10147_OID00532	0.838235794	0.679465422	0.950259614	0.439477773	0.677790878
olink_Flt3L_P49771_OID00533	0.023676689	0.123782356	0.184739393	0.001040874	0.008326991
olink_CXCL6_P80162_OID00534	0.00015746	0.058048519	0.006725129	1.91E-05	0.000352003
olink_CXCL10_P02778_OID00535	7.48E-05	0.495941307	0.00458634	1.76E-10	1.08E-08
olink_4E-BP1_Q13541_OID00536	0.609670062	0.603464285	0.940820948	0.423880531	0.672362222
olink_IL-20_Q9NYY1_OID00537	0.985437374	0.890439123	0.996266356	0.933274477	0.959357802
olink_SIRT2_Q8IXJ6_OID00538	0.467756961	0.60748271	0.905971377	0.182145433	0.406870548
olink_CCL28_Q9NRJ3_OID00539	0.888695039	0.990169094	0.952902125	0.849448045	0.935918804
olink_DNER_Q8NFT8_OID01213	0.490155018	0.634395238	0.908705263	0.625181228	0.777252338
olink_EN-RAGE_P80511_OID00541	0.736791299	0.860234704	0.940820948	0.505728242	0.713593156
olink_CD40_P25942_OID00542	0.833356465	0.547477035	0.950259614	0.586475239	0.754812605
olink_IL33_O95760_OID00543	0.515192549	0.499330026	0.908705263	0.474367419	0.705029418
olink_IFN-gamma_P01579_OID05547	0.000818296	0.078896115	0.018820804	0.000119252	0.001371402
olink_FGF-19_O95750_OID00545	0.675798866	0.590081642	0.940820948	0.537292452	0.716389936
olink_IL4_P05112_OID00546	0.321854627	0.382046612	0.819161739	0.283344026	0.541652872
olink_LIF_P15018_OID00547	0.859754749	0.591908236	0.950259614	0.769083742	0.884446303
olink_NRTN_Q99748_OID00548	0.593404086	0.649037178	0.940820948	0.285545264	0.541652872
olink_MCP-2_P80075_OID00549	1.23E-07	0.769606262	2.26E-05	1.35E-15	2.49E-13
olink_CASP-8_Q14790_OID00550	0.752562699	0.517651268	0.940820948	0.520787101	0.713593156
olink_CCL25_O15444_OID00551	0.104724668	0.034047824	0.481733473	0.032483042	0.124518327
olink_CX3CL1_P78423_OID00552	0.266785021	0.369010454	0.743764301	0.005593369	0.033199352
olink_TNFRSF9_Q07011_OID00553	0.024096443	0.181851134	0.184739393	9.48E-05	0.001162723
olink_NT-3_P20783_OID00554	0.837974854	0.552989509	0.950259614	0.819766971	0.925381121
olink_TWEAK_O43508_OID00555	0.1426732	0.31812292	0.570692801	0.095874665	0.278367267
olink_CCL20_P78556_OID00556	0.644339403	0.354791261	0.940820948	0.436893314	0.677790878
olink_ST1A1_P50225_OID00557	0.436859713	0.71054563	0.898689985	0.427622452	0.672500266
olink_STAMBP_O95630_OID00558	0.739351732	0.98235501	0.940820948	0.379757542	0.639401319
olink_IL5_P05113_OID00559	0.7385741	0.595554406	0.940820948	0.523560196	0.713593156
olink_ADA_P00813_OID00560	0.890756334	0.93839233	0.952902125	0.659330715	0.806421827
olink_TNFB_P01374_OID00561	0.231391186	0.937328705	0.675809178	0.138894444	0.345359159
olink_CSF-1_P09603_OID00562	0.080214783	0.878804814	0.431860522	0.01636411	0.078086115
olink_PPP1R9B_Q96SB3_OID00936	0.940968381	0.760357179	0.972686416	0.989456147	0.989456147
olink_GLB1_P16278_OID00937	0.812935141	0.569725161	0.94751853	0.756776739	0.88130962
olink_PSIP1_O75475_OID00938	0.659735923	0.50842755	0.940820948	0.093484564	0.278367267
olink_ZBTB16_Q05516_OID00939	0.459113362	0.212887356	0.898689985	0.494687922	0.711113888
olink_IRAK4_Q9NWZ3_OID00940	0.438389788	0.301144752	0.898689985	0.409446049	0.66086029
olink_TPSAB1_Q15661_OID00941	0.565495936	0.311323679	0.929029038	0.896804362	0.948344843
olink_HCLS1_P14317_OID00942	0.883635045	0.619550037	0.952902125	0.480952802	0.705029418
olink_CNTNAP2_Q9UHC6_OID00943	0.107510881	0.151341802	0.482487857	0.165963595	0.39658833
olink_CLEC4G_Q6UXB4_OID00944	0.259655111	0.538930323	0.735023698	0.172045278	0.400757295
olink_IRF9_Q00978_OID00945	0.642603295	0.77903974	0.940820948	0.736526574	0.863190379
olink_EDAR_Q9UNE0_OID00946	0.727400463	0.425832426	0.940820948	0.325264155	0.587858347
olink_IL6_P05231_OID00947	0.022403569	0.042246677	0.184739393	5.37E-05	0.00081652
olink_DGKZ_Q13574_OID00948	0.116248631	0.190702907	0.497436003	0.274503818	0.533648843
olink_CLEC4C_Q8WTT0_OID00949	0.229211984	0.441352009	0.675809178	0.000699276	0.005848493
olink_IRAK1_P51617_OID00950	0.616648358	0.651032919	0.940820948	0.690845814	0.825426168
olink_CLEC4A_Q9UMR7_OID00951	0.000537994	0.001756608	0.014141556	0.00039735	0.003655619
olink_PRDX1_Q06830_OID00952	0.745450331	0.520027402	0.940820948	0.845774919	0.935918804
olink_PRDX3_P30048_OID00953	0.167333021	0.460652752	0.622833141	0.108650238	0.297070267
olink_FGF2_P09038_OID00954	0.405547891	0.854957833	0.898689985	0.017971198	0.078730961
olink_PRDX5_P30044_OID00955	0.751711133	0.459393217	0.940820948	0.645906463	0.797629458
olink_DPP10_Q8N608_OID00956	0.539551921	0.712586147	0.910803243	0.042214478	0.143841923
olink_TRIM5_Q9C035_OID00957	0.767972231	0.891868006	0.942045937	0.943716099	0.959357802
olink_DCTN1_Q14203_OID00958	0.359337962	0.197859753	0.858677727	0.186571819	0.408681128
olink_ITGA6_P23229_OID00959	0.205066521	0.604845957	0.639397798	0.115164505	0.307105347
olink_CDSN_Q15517_OID00960	0.289131887	0.225012726	0.790941474	0.164146528	0.39658833
olink_GALNT3_Q14435_OID00961	0.903251974	0.963185232	0.955163007	0.88333248	0.939698632
olink_FXYD5_Q96DB9_OID00962	0.87521782	0.71873014	0.952902125	0.872212637	0.939698632
olink_TRAF2_Q12933_OID00963	0.687232268	0.438671669	0.940820948	0.595403318	0.754812605
olink_TRIM21_P19474_OID00964	0.447591965	0.595543094	0.898689985	0.252526711	0.499622741
olink_LILRB4_Q8NHJ6_OID00965	0.727107749	0.828217754	0.940820948	0.121855929	0.315795647
olink_NTF4_P34130_OID00966	0.728806917	0.994722349	0.940820948	0.568327391	0.746944571
olink_KRT19_P08727_OID00967	0.45799401	0.556379861	0.898689985	0.241555561	0.483111122
olink_ITM2A_O43736_OID00968	0.208499282	0.224310389	0.639397798	0.402368902	0.655184761
olink_HNMT_P50135_OID00969	0.631204599	0.67774871	0.940820948	0.178658739	0.406870548
olink_CCL11_P51671_OID00970	0.947775334	0.912613563	0.974249506	0.325877997	0.587858347
olink_MILR1_Q7Z6M3_OID00971	0.201334584	0.452435542	0.638716611	0.198421797	0.429524831
olink_EGLN1_Q9GZT9_OID00972	0.013120737	0.126193492	0.139555349	0.005060699	0.031038956
olink_NFATC3_Q12968_OID00973	0.503619322	0.407464294	0.908705263	0.131795619	0.332197176
olink_LY75_O60449_OID00974	0.596959467	0.751254626	0.940820948	0.420373482	0.672362222
olink_EIF5A_P63241_OID00975	0.115682546	0.22148135	0.497436003	0.001307906	0.010027281
olink_EIF4G1_Q04637_OID00976	0.885234024	0.631764244	0.952902125	0.563502842	0.745931819
olink_CD28_P10747_OID00977	0.742676176	0.991024663	0.940820948	0.217546909	0.460099211
olink_PTH1R_Q03431_OID00978	0.183258195	0.843485294	0.634389125	0.214301672	0.458505904
olink_BIRC2_Q13490_OID00979	0.170763008	0.628099186	0.622833141	0.182923503	0.406870548
olink_HSD11B1_P28845_OID00980	0.899261329	0.645900422	0.955163007	0.906204159	0.952808944
olink_NF2_P35240_OID00981	0.644691385	0.985167808	0.940820948	0.517534273	0.713593156
olink_PLXNA4_Q9HCM2_OID00982	0.139734929	0.053064194	0.570692801	0.15889685	0.389826938
olink_SH2B3_Q9UQQ2_OID00983	0.431108544	0.310116211	0.898689985	0.442037529	0.677790878
olink_FCRL3_Q96P31_OID00984	0.658880972	0.689974042	0.940820948	0.482791884	0.705029418
olink_CKAP4_Q07065_OID00985	0.99559344	0.997294656	0.999989881	0.342275232	0.605394667
olink_JUN_P05412_OID00986	0.333897448	0.220103813	0.819161739	0.017839676	0.078730961
olink_HEXIM1_O94992_OID00987	0.547243735	0.631704451	0.915389521	0.522781575	0.713593156
olink_CLEC4D_Q8WXI8_OID00988	0.649887118	0.723964041	0.940820948	0.128936344	0.329503989
olink_PRKCQ_Q04759_OID00989	0.238637112	0.226416311	0.686081697	0.576556109	0.752385277
olink_MGMT_P16455_OID00990	0.453014334	0.818615162	0.898689985	0.00017258	0.001764153
olink_TREM1_Q9NP99_OID00991	0.006074988	0.148784267	0.08598444	5.77E-05	0.00081652
olink_CXADR_P78310_OID00992	0.533165497	0.444012654	0.910803243	0.067319137	0.209944427
olink_IL10_P22301_OID00993	0.084408621	0.143122287	0.431860522	0.013550652	0.071237714
olink_SRPK2_P78362_OID00994	0.061618225	0.18615786	0.39040216	0.014306984	0.073124583
olink_KLRD1_Q13241_OID00995	0.306588104	0.624657825	0.794538185	0.087013324	0.26684086
olink_BACH1_O14867_OID00996	0.422591706	0.269263662	0.898689985	0.797811787	0.906156598
olink_PIK3AP1_Q6ZUJ8_OID00997	0.760014382	0.911501247	0.940820948	0.879509065	0.939698632
olink_SPRY2_O43597_OID00998	0.410872683	0.848455753	0.898689985	0.357498212	0.609071027
olink_STC1_P52823_OID00999	0.517084289	0.725500077	0.908705263	0.016550861	0.078086115
olink_ARNT_P27540_OID01000	0.518554634	0.502583497	0.908705263	0.236181844	0.48286066
olink_FAM3B_P58499_OID01001	0.200275466	0.127411174	0.638716611	0.03594175	0.132265641
olink_SH2D1A_O60880_OID01002	0.000182748	0.001998636	0.006725129	0.000667328	0.005847065
olink_ICA1_Q05084_OID01003	0.332070397	0.165620323	0.819161739	0.342357396	0.605394667
olink_DFFA_O00273_OID01004	0.999989881	0.999647794	0.999989881	0.95886477	0.964104468
olink_DCBLD2_Q96PD2_OID01005	0.061776606	0.96350251	0.39040216	0.01104669	0.059782088
olink_FCRL6_Q6DN72_OID01006	0.018916285	0.03965255	0.183189289	0.004306541	0.02732426
olink_NCR1_O76036_OID01007	0.163839857	0.753849917	0.622833141	0.06540821	0.207501908
olink_CXCL12_P48061_OID01008	0.004314284	0.056508792	0.066152356	0.004010729	0.026356221
olink_AREG_P15514_OID01009	0.388349627	0.72427516	0.893204142	0.492876909	0.711113888
olink_IFNLR1_Q8IU57_OID01010	0.172633099	0.764147352	0.622833141	0.107231149	0.297070267
olink_DAPP1_Q9UN19_OID01011	0.862463889	0.587054445	0.950259614	0.51553544	0.713593156
olink_PADI2_Q9Y2J8_OID01012	0.126110516	0.250243313	0.52737125	0.028384535	0.11353814
olink_SIT1_Q9Y3P8_OID01013	0.013652154	0.222470395	0.139555349	0.00014602	0.001580447
olink_MASP1_P48740_OID01014	0.096625213	0.113799861	0.467869452	7.48E-05	0.00098347
olink_LAMP3_Q9UQV4_OID01015	0.838003374	0.650372628	0.950259614	0.535204287	0.716389936
olink_CLEC7A_Q9BXN2_OID01016	0.813630042	0.521426451	0.94751853	0.860221093	0.939698632
olink_CLEC6A_Q6EIG7_OID01017	0.04093218	0.023801641	0.285339053	0.0083462	0.047990649
olink_DDX58_O95786_OID01018	0.536758381	0.366919734	0.910803243	0.466327491	0.705029418
olink_IL12RB1_P42701_OID01019	0.61483082	0.815214442	0.940820948	0.009082849	0.050643762
olink_TANK_Q92844_OID01020	0.509144749	0.942919657	0.908705263	0.505960347	0.713593156
olink_ITGA11_Q9UKX5_OID01021	0.020516327	0.297157641	0.184739393	1.95E-06	5.13E-05
olink_KPNA1_P52294_OID01022	0.438629264	0.231402607	0.898689985	0.914047574	0.955595191
olink_LAG3_P18627_OID01023	0.218466171	0.283748144	0.658979925	0.121145081	0.315795647
olink_IL5_P05113_OID01024	0.588727827	0.32196578	0.940820948	0.864020352	0.939698632
olink_CD83_Q01151_OID01025	0.071117247	0.173041818	0.399766379	0.109786838	0.297070267
olink_ITGB6_P18564_OID01026	0.201235387	0.144765455	0.638716611	0.064324652	0.207501908
olink_BTN3A2_P78410_OID01027	0.071697231	0.139000933	0.399766379	0.030161436	0.118078815
IgG_antibody_value	1.02E-13	0.357354194	1.02E-13	2.55E-14	2.55E-14
