# Supplementary material for: Early immune markers of clinical, virological, and immunological outcomes in patients with COVID-19: a multi-omics study
Source: eLife. 2022 Oct 14;11:e77943. doi: 10.7554/eLife.77943 (PMC9566856; doi:10.7554/eLife.77943)
Supplement: Supplementary file 3. [file elife-77943-supp3.csv]

variable	severity_t	severity_p	viral_t	viral_p	tcell_t	tcell_p	Ab_28days_t	Ab_28days_p	Ab2_7M_t	Ab2_7M_p
GO_activated dendritic cells (M67)	3.227257055	0.001496581	0.473142435	0.636768728	2.673123646	0.008441785	3.545218857	0.0005634	2.121212903	0.036622704
GO_antiviral IFN signature (M75)	3.231320074	0.001476679	1.21290196	0.226989123	2.103350314	0.037290648	2.476290694	0.014693676	1.386095616	0.169104833
GO_ATF targets network (M41.4)	0.386322109	0.6997356	-2.253204545	0.025631213	1.237597446	0.218013545	-1.028204904	0.305956491	-0.536092598	0.59320257
GO_axon guidance (M110)	0.34602826	0.729744368	-2.853161818	0.004912475	2.670455905	0.008505698	0.488352751	0.626206296	1.232768901	0.220837298
GO_B cell development (M9)	0.233719234	0.815480895	-0.169026293	0.865993535	1.658503339	0.099537604	0.521556717	0.602956559	-0.068725845	0.945358636
GO_B cell development/activation (M58)	0.913892815	0.362052482	-1.426708056	0.155649698	1.270314092	0.206157739	3.087138749	0.002519195	1.054678802	0.29436444
GO_B cell surface signature (S2)	-0.321920747	0.747903646	-2.283563385	0.023738123	0.582468293	0.56122286	0.103394316	0.917825542	1.006767171	0.316716225
GO_BCR signaling (M54)	0.409712479	0.682526684	-0.022615593	0.981985623	1.520819729	0.13064384	1.956803063	0.052732593	-0.610977104	0.542737869
GO_blood coagulation (M11.1)	1.195410317	0.233572311	-0.425118193	0.671332607	2.210448869	0.028757887	1.482705017	0.140818663	-0.119939539	0.904795448
GO_CCR1, 7 and cell signaling (M59)	2.491914564	0.013652601	-0.711259936	0.477978573	2.624397629	0.009680329	0.810607509	0.419222966	0.53606829	0.5932193
GO_CD1 and other DC receptors (M50)	-1.645233316	0.101747965	-2.774266665	0.006204068	-0.310691539	0.756514309	-0.003614519	0.997122141	-1.392806861	0.167071735
GO_CD28 costimulation (M12)	-1.412865816	0.159502171	1.746297199	0.082715198	-2.363066256	0.019551275	-3.832477161	0.000204943	-1.416676526	0.159991816
GO_cell adhesion (GO) (M117)	-0.5664363	0.571835581	1.970576248	0.050530908	-2.518770169	0.012943516	-5.936836889	2.99E-08	-2.591314622	0.011136362
GO_cell adhesion (M51)	0.777288643	0.438056246	-3.006807935	0.003075135	3.16693415	0.001905049	0.466001496	0.642073483	1.885600153	0.062539027
GO_cell adhesion, membrane (M133.0)	0.567716746	0.570967619	-1.257597505	0.210404738	2.178085135	0.031136612	-0.841802733	0.401601205	0.02677224	0.978700018
GO_cell cell adhesion (M133.1)	0.944429801	0.346274825	-1.981641088	0.049265363	2.133031581	0.034731292	-0.183924261	0.854388564	0.741676191	0.460193437
GO_cell cycle (I) (M4.1)	0.509110561	0.611327225	-0.76537747	0.445195848	2.948736879	0.003761475	1.1835009	0.238989478	0.670096213	0.504493393
GO_cell cycle (II) (M4.10)	0.250136697	0.802780153	-1.119075344	0.264817211	3.192637665	0.001754287	1.291203154	0.199156993	0.503399032	0.615900132
GO_cell cycle (III) (M103)	0.268605708	0.788555018	-1.210965207	0.227728457	3.242102606	0.001494885	1.338369411	0.18334918	0.99692387	0.32144501
GO_cell cycle and growth arrest (M31)	2.373006957	0.018747622	-0.250149775	0.802798554	1.956199029	0.052506242	1.068485284	0.287482635	-0.120972436	0.903979582
GO_cell cycle and transcription (M4.0)	1.334672831	0.183747522	-0.334174578	0.738693792	3.265775139	0.001383814	2.589775431	0.010812938	0.391450824	0.696379145
GO_cell cycle, ATP binding (M144)	1.055313185	0.292762197	0.196616906	0.844381625	1.315184711	0.190677334	-0.020941036	0.983328061	-0.542223667	0.588989799
GO_cell cycle, mitotic phase (M230)	-0.094364897	0.924929139	0.326821454	0.744238235	-2.440175736	0.015976893	-4.015283994	0.00010476	-2.021220111	0.046195082
GO_cell development (M175)	0.246135854	0.805870552	-1.106669984	0.270129404	1.391712201	0.166298376	-1.228018946	0.22188374	0.131073706	0.896006342
GO_cell division (M37.3)	-0.43570501	0.663597078	0.1645224	0.869531542	1.490526271	0.138418713	-0.840506934	0.402324104	0.127452948	0.898863132
GO_cell junction (GO) (M4.13)	0.947142116	0.344895122	-0.319521238	0.749756058	2.394147696	0.018033259	2.307024085	0.02279724	0.097268136	0.922727372
GO_cell junction (M162.1)	1.140859623	0.255514335	-1.447910888	0.149635985	1.293495581	0.19804856	-0.434382072	0.664804286	0.383049759	0.702576202
GO_chemokine cluster (I) (M27.0)	2.353747209	0.019714651	-0.79993263	0.42495852	2.244241108	0.026444572	0.400942196	0.689187758	1.289659245	0.200437077
GO_chemokine cluster (II) (M27.1)	2.648496632	0.008837459	0.183914718	0.854317682	1.820290767	0.070929758	2.063340603	0.041273761	1.401305132	0.164524135
GO_chemokines and receptors (M38)	0.368037938	0.713297474	0.792877667	0.429045635	1.798970038	0.074257379	0.07982829	0.936509051	0.856737825	0.393840316
GO_chromosome Y linked (M240)	0.388084293	0.698433546	0.075840631	0.939642445	3.265669424	0.001384293	2.21189051	0.028900111	0.668106707	0.505756525
GO_collagen, TGFB family et al (M77)	0.178270673	0.858720203	-2.472135038	0.014497746	2.08413631	0.03903263	0.200999739	0.841044831	1.215228956	0.227422316
GO_complement activation (I) (M112.0)	2.635978055	0.009156762	-1.307698534	0.192887221	4.246255228	4.02E-05	2.771203876	0.006490849	1.206655841	0.230692202
GO_complement activation (II) (M112.1)	1.593705903	0.112837894	-2.978895406	0.003352811	3.648517843	0.000375766	1.108179258	0.270038074	1.498231574	0.137534065
GO_CORO1A-DEF6 network (I) (M32.2)	-0.791485525	0.429750842	1.06404115	0.28894384	0.215048365	0.83005414	-0.876129141	0.382739881	-0.757651876	0.450616934
GO_CORO1A-DEF6 network (II) (M32.4)	-0.434399533	0.664542798	1.394842762	0.165033533	-0.006918858	0.994489808	-1.210627814	0.228457366	-1.19608043	0.234772408
GO_cytokines - recepters cluster (M115)	2.370480536	0.01887204	-1.894273664	0.060027599	0.931435833	0.353290884	0.010895035	0.99132559	0.807229637	0.421639095
GO_cytoskeletal remodeling (M32.8)	-0.461589251	0.644959141	0.225928927	0.82155055	0.465841181	0.64207989	-0.483344401	0.629746875	-0.170762911	0.864789303
GO_DC surface signature (S5)	2.264908285	0.024766151	-1.980843871	0.049355639	3.616052204	0.000421377	2.019641571	0.04568615	1.722689415	0.088341554
GO_DNA repair (M76)	0.127084523	0.899021949	0.316829161	0.751794131	1.954337598	0.052728208	0.539480022	0.590572206	0.267405972	0.789761719
GO_double positive thymocytes (M126)	-1.406061678	0.16150978	-0.425215333	0.671261948	-1.767012706	0.079485801	-4.450186431	1.96E-05	-1.714157933	0.089903954
GO_E2F1 targets (Q3) (M10.0)	-0.048623796	0.961275521	-0.920175295	0.358892844	2.679250161	0.00829665	0.0499552	0.960242549	-0.026994408	0.978523305
GO_E2F1 targets (Q4) (M10.1)	0.203462397	0.839014145	-0.809552509	0.419422648	3.219147714	0.001610471	1.539510728	0.126357031	0.375891934	0.707872103
GO_endoplasmic reticulum (M37.2)	2.522128504	0.012572794	-1.595240867	0.112669417	2.93806858	0.003885172	2.499702661	0.013803852	0.737984828	0.462422549
GO_enriched for cell migration (M122)	0.88150135	0.37927669	-2.231620738	0.027056093	1.872179909	0.063345075	-0.002181288	0.998263269	1.224320395	0.223991567
GO_enriched for SMAD2/3 signaling (M97)	0.320182895	0.749218313	-4.340085551	2.54E-05	1.22115671	0.22415507	1.068631866	0.287416829	-0.118147674	0.90621105
GO_enriched for TF motif PAX3 (M179)	-0.164021226	0.869907016	1.601612843	0.111251405	-2.092321519	0.038282176	-3.342246682	0.00111373	-1.306807823	0.194570841
GO_enriched for ubiquitination (M138)	0.439613197	0.660769128	1.544803159	0.124407182	-0.474119909	0.63618034	-0.797132409	0.426975179	-1.275171831	0.205494411
GO_enriched in B cells (I) (M47.0)	-2.119164367	0.035511911	-2.346101558	0.02022054	-1.775961915	0.077992014	3.449017877	0.000780915	1.125703409	0.26325121
GO_enriched in B cells (II) (M47.1)	-1.632911898	0.104316816	-3.181484535	0.001766203	-1.107695905	0.269962848	3.8253358	0.000210297	1.312182884	0.19275874
GO_enriched in B cells (III) (M47.2)	-1.018710791	0.309771055	-4.051526939	7.98E-05	1.167978711	0.244873938	3.946547245	0.000135159	1.485046083	0.140987602
GO_enriched in B cells (IV) (M47.3)	-0.983533187	0.326726554	-4.350899382	2.43E-05	0.866927478	0.38752001	3.619206403	0.000436458	1.604035447	0.112171508
GO_enriched in B cells (V) (M47.4)	-0.593125995	0.553875927	-2.406742159	0.017256664	-1.826434549	0.069994142	3.077427154	0.002596348	0.612263255	0.541890478
GO_enriched in B cells (VI) (M69)	-2.249523152	0.02574742	-1.619824731	0.107276853	-2.350783379	0.020181616	3.072247129	0.00263839	1.039652337	0.301255919
GO_enriched in cell cycle (M167)	-0.313547661	0.754244535	2.08751122	0.038457159	-0.640547903	0.522902229	-1.480870587	0.141306315	0.033551233	0.973308494
GO_enriched in dendritic cells (M168)	1.619063855	0.10726569	-0.934209537	0.351630412	3.281462729	0.001314501	1.780365219	0.077589748	-0.034453395	0.972591066
GO_enriched in membrane proteins (M124)	2.037099307	0.043172737	-0.053027353	0.957777527	2.239722494	0.026744175	0.629900368	0.529977601	1.359992064	0.177192274
GO_enriched in monocytes (I) (M4.15)	-0.611681091	0.541556433	0.312715093	0.754912118	0.842185595	0.401173578	2.030111719	0.044593831	-0.207369434	0.8361847
GO_enriched in monocytes (II) (M11.0)	1.068202459	0.286926116	-0.169854321	0.865343375	1.89008971	0.060889752	2.2722763	0.024880602	0.010315296	0.991792311
GO_enriched in monocytes (III) (M73)	1.840332703	0.067442606	0.058468503	0.953449802	1.847966483	0.066795613	1.914165273	0.058020769	0.129002061	0.897640712
GO_enriched in monocytes (IV) (M118.0)	0.75404636	0.451852442	-0.851923385	0.395554247	2.026186908	0.044715618	2.185153369	0.030853598	0.016142197	0.987156289
GO_enriched in neutrophils (I) (M37.1)	1.477643658	0.141331945	-1.132978325	0.258950595	1.590508281	0.114059347	1.01341048	0.3129376	-0.328713742	0.743127326
GO_enriched in neutrophils (II) (M163)	0.690032549	0.491103715	0.274685693	0.783918847	0.949187158	0.344221538	0.064995747	0.948287371	-0.770691624	0.442886104
GO_enriched in NK cells (I) (M7.2)	-0.809080737	0.419586484	1.268841618	0.206375516	-0.757402082	0.450128981	-1.094607146	0.275918081	0.268592794	0.788851028
GO_enriched in NK cells (II) (M61.0)	-1.630303619	0.104867216	1.696056446	0.091857175	-2.088576614	0.038623971	-2.09193088	0.038589098	-0.656356205	0.513251268
GO_enriched in NK cells (III) (M157)	-1.547011126	0.123698531	1.534612818	0.126891701	-1.894411451	0.060309357	-1.552319953	0.123263688	-0.095804253	0.923886703
GO_enriched in T cells (I) (M7.0)	-1.510624882	0.132719013	2.078612136	0.039279838	-2.61408405	0.009962614	-4.002438052	0.000109893	-1.029058871	0.306179467
GO_enriched in T cells (II) (M223)	-1.369410962	0.172656194	1.943922811	0.053692718	-3.537386237	0.000554514	-4.010335569	0.00010671	-1.081837523	0.282183239
GO_erythrocyte differentiation (M173)	0.481361501	0.630871423	0.381717937	0.703186732	0.349580805	0.727198051	-0.38378715	0.701826859	0.96862822	0.335298133
GO_extracellular matrix (I) (M2.0)	-0.092490401	0.926416057	-2.639634239	0.009136822	2.089054318	0.038580226	-0.184491111	0.853944896	1.058768456	0.292507575
GO_extracellular matrix (II) (M2.1)	1.040664482	0.299491899	-1.496512025	0.136527865	2.871718883	0.004742126	1.642257281	0.103199103	1.34252864	0.182764162
GO_extracellular matrix (III) (M2.2)	0.259440523	0.795605629	-2.547988421	0.011794895	1.562486465	0.120514608	-0.170181576	0.865158779	0.972274389	0.333491395
GO_golgi membrane (I) (M113)	1.21850436	0.224701045	-2.093844125	0.037880755	1.529403362	0.128504282	1.616901315	0.108569899	0.079053441	0.937163697
GO_golgi membrane (II) (M237)	1.929344952	0.055333952	-0.32222208	0.747713119	1.21442839	0.226704206	0.519342376	0.604494769	-0.627689936	0.531779055
GO_heme biosynthesis (I) (M171)	0.599556759	0.549590644	1.469531344	0.143689746	0.136916174	0.891301033	-0.282424535	0.778112788	0.578561679	0.564314169
GO_heme biosynthesis (II) (M222)	0.598160753	0.550519501	1.37209109	0.171992369	0.2262725	0.82133172	-0.341006735	0.733704935	1.031513352	0.305033894
GO_Hox cluster I (M17.0)	0.18423228	0.854048266	-1.706527629	0.089887046	2.864503694	0.004845067	-0.955784584	0.341135098	0.489945708	0.625351444
GO_Hox cluster II (M17.1)	-0.695482571	0.48769151	-1.500327031	0.135538032	1.442780846	0.151398432	-0.205593417	0.837462786	0.577184581	0.565240008
GO_Hox cluster III (M17.2)	-0.86737642	0.386944281	-2.039933603	0.043032998	2.62611155	0.009634124	-1.033898084	0.3032981	1.45534203	0.149015723
GO_Hox cluster IV (M17.3)	-0.752389824	0.452845105	-1.957328986	0.052082135	1.386477812	0.167886493	-0.754449974	0.452082091	0.430405679	0.667918211
GO_Hox cluster V (M96)	-1.562083901	0.120106265	-1.720433565	0.087323905	1.543924427	0.124947565	-0.290412037	0.772010799	0.487853495	0.626826974
GO_Hox cluster VI (M107)	-1.660224662	0.09869125	-1.218073829	0.225023289	2.656589148	0.008845013	-0.626110727	0.532451575	0.319103894	0.75037907
GO_IL2, IL7, TCR network (M65)	-0.104545353	0.916858389	2.098549871	0.03745727	-2.24328804	0.026507519	-4.623950676	9.71E-06	-1.336947694	0.184572379
GO_inflammatory response (M33)	0.504253654	0.614728474	0.790088793	0.430667641	1.197193614	0.233329087	2.225107259	0.027974926	0.182562011	0.855547793
GO_innate antiviral response (M150)	2.986306814	0.003235987	1.545674109	0.124196625	1.825289418	0.070167749	2.288640513	0.023879511	1.450386516	0.150388925
GO_inositol phosphate metabolism (M129)	2.29179304	0.023129712	-0.759680602	0.448584715	0.323309697	0.746960981	0.956768991	0.340639979	-0.580886335	0.562752961
GO_integrins and cell adhesion (M84)	0.474068134	0.636052566	1.343983849	0.180892567	-1.539380325	0.126052134	0.313192882	0.754687026	0.475272342	0.635731679
GO_intracellular transport (M147)	0.916826172	0.360517454	0.21152174	0.832754497	0.113542986	0.909768765	-1.217221328	0.225948758	-1.59356583	0.114500962
GO_KLF12 targets network (M32.3)	0.073913777	0.941164882	0.988971406	0.324198846	1.619789082	0.107611282	0.036800094	0.970706582	-1.120929607	0.265267246
GO_leukocyte differentiation (M160)	1.371474961	0.172013442	-0.142611134	0.886780159	1.84952235	0.066569284	1.309349513	0.192959802	0.643696884	0.521390997
GO_leukocyte migration (M88.0)	0.55235138	0.581424679	-2.303166238	0.022581841	2.666378649	0.008604225	0.083453657	0.933632234	1.269033886	0.207665277
GO_lymphocyte generic cluster (M60)	-2.443615466	0.015550931	-0.204443659	0.838271606	-2.550764795	0.011864041	-0.172339183	0.863466117	0.337486431	0.736527465
GO_lysosomal/endosomal proteins (M139)	-0.078158965	0.937792454	0.820407102	0.413227932	1.589273496	0.114337882	1.880180622	0.062549155	-0.543406156	0.588178906
GO_lysosome (M209)	0.205978004	0.837051693	0.382101593	0.702902722	1.989303773	0.048688735	1.879879378	0.062590583	-0.094482279	0.92493379
GO_MAPK, RAS signaling (M100)	-0.337505524	0.736147377	1.273454647	0.204738946	0.74208152	0.45932709	0.350013851	0.726952266	-0.420644511	0.675006404
GO_Membrane, ER proteins (M134)	-0.089272169	0.928969475	-2.108245382	0.036597549	1.313602739	0.191207978	3.559674042	0.000536141	2.212545122	0.029431239
GO_Memory B cell surface signature (S9)	0.027878115	0.977791683	-2.749036392	0.006678079	1.798849208	0.074276599	-0.253105583	0.800627046	0.350269871	0.726945631
GO_metabolism of steroids (M225)	0.391946714	0.69558279	-2.651930591	0.008824635	2.001499859	0.047343007	0.672471396	0.502598338	1.131737721	0.260718259
GO_MHC-TLR7-TLR8 cluster (M146)	1.081507207	0.280985546	0.497025106	0.619866636	1.352919337	0.178342831	-1.177811801	0.241241617	2.186631253	0.031334295
GO_mismatch repair (I) (M22.0)	0.479275288	0.632351596	-0.474369753	0.635895369	2.393180704	0.018078867	0.344631596	0.73098482	0.022293575	0.982262586
GO_mismatch repair (II) (M22.1)	-0.745317792	0.457096893	-0.199767032	0.841921294	2.032992376	0.044013574	0.539055786	0.590863964	0.252050409	0.801570491
GO_mitochondrial cluster (M235)	-1.363899876	0.174381283	0.306685025	0.759489492	-0.914328479	0.362174432	-1.151631962	0.251800375	-0.662479605	0.509338299
GO_mitotic cell cycle (M4.7)	0.224840416	0.822370317	-2.266150173	0.024808406	3.68653713	0.000328286	2.062131181	0.041390775	0.878739898	0.381856741
GO_mitotic cell division (M6)	0.528512258	0.597825128	-0.320949139	0.74867576	2.761443881	0.006556239	1.289726545	0.19966768	1.046804765	0.297962143
GO_Monocyte surface signature (S4)	1.206937775	0.229113366	-0.017915856	0.985728727	1.527715318	0.128922855	2.120590913	0.036050108	-0.100566199	0.920116066
GO_Naive B cell surface signature (S8)	-0.268043316	0.78898716	-2.333320732	0.02089961	0.270718684	0.787020869	0.001636658	0.9986969	0.350367499	0.726872619
GO_NK cell surface signature (S1)	0.882409125	0.378787158	-1.197435316	0.232941705	1.461375522	0.146236133	0.495776425	0.620974275	1.317615976	0.190939917
GO_nuclear pore complex (M106.0)	0.112068439	0.910899821	2.102620361	0.03709424	-0.698675574	0.485956669	-0.67951168	0.49814451	0.076613852	0.939098931
GO_nucleotide metabolism (M181)	-1.392677274	0.165515032	-0.64618318	0.519104156	0.832024726	0.406864342	-0.520353721	0.603792009	-0.503305229	0.61596581
GO_olfactory receptors (M228)	-0.147730555	0.882728453	-2.286112894	0.023584863	1.440888424	0.151931584	0.847010349	0.398703957	0.596958454	0.55201749
GO_Plasma cell surface signature (S3)	0.681306147	0.496594062	-3.456425398	0.000704339	3.799714645	0.000218316	2.23796411	0.02709985	1.151951075	0.252358587
GO_platelet activation (I) (M32.0)	-0.309763594	0.757115708	0.925863815	0.355937753	1.186581897	0.237476549	-0.691399309	0.490672679	-1.081109847	0.282505019
GO_platelet activation (II) (M32.1)	-0.133803925	0.893714052	1.147048662	0.253106538	1.189485265	0.236336605	-0.491861971	0.623730688	-0.723334915	0.47132935
GO_platelet activation (III) (M42)	1.271338541	0.205324772	-0.263921127	0.792186799	1.979979357	0.049739382	1.363029878	0.175468403	-0.974555901	0.332364123
GO_PLK1 signaling events (M4.2)	0.654762216	0.513495499	-1.154225802	0.250161529	2.690128619	0.008044493	0.957501314	0.34027195	0.881941176	0.380132284
GO_proteasome (M226)	0.55924459	0.576722263	0.608709524	0.543596706	1.396921734	0.164729166	1.166555743	0.245742042	0.51461195	0.608071848
GO_putative targets of PAX3 (M89.0)	0.844358358	0.399642058	-0.769432556	0.442792623	3.126765996	0.002164916	1.185661611	0.238138067	0.534361409	0.594394638
GO_putative targets of PAX3 (M89.1)	0.72724385	0.468065292	0.153411877	0.878270484	2.555586712	0.011708548	2.061300245	0.041471334	0.852351189	0.396256917
GO_Ran mediated mitosis (M15)	0.46753066	0.640712056	-0.20790111	0.835575627	2.662416307	0.008700962	0.894044344	0.373118058	0.70955783	0.479792534
GO_receptors, cell migration (M109)	1.276922223	0.203350874	0.547853345	0.584570662	-0.265427272	0.791085216	-1.908199886	0.058795075	-1.169438208	0.245281127
GO_recruitment of neutrophils (M132)	1.510434145	0.132767617	0.179702597	0.857617777	0.887595337	0.37633707	0.430274786	0.667780585	-0.796569624	0.427774327
GO_Rho GTPase cycle (M4.14)	1.208330231	0.228578914	-0.19590048	0.844941388	2.508415944	0.013311221	0.602064074	0.548286606	0.672250344	0.50312765
GO_RIG-1 like receptor signaling (M68)	3.238734897	0.001440992	1.174990806	0.241777343	2.045410945	0.042756725	2.539312722	0.012407633	1.701805383	0.092206118
GO_signaling in T cells (I) (M35.0)	1.343763363	0.180794895	-1.565341758	0.119516183	3.192317243	0.001756096	1.342412166	0.182039336	2.337622581	0.021599508
GO_signaling in T cells (II) (M35.1)	-0.029651549	0.97637933	-0.983959088	0.326649536	1.616341141	0.108355066	-0.316955831	0.751837203	1.476767133	0.143190418
GO_spliceosome (M250)	-1.024477923	0.307048271	0.739663182	0.460608937	-0.427938843	0.66937755	-0.372028725	0.710538727	-1.03274545	0.304459932
GO_suppression of MAPK signaling (M56)	0.824133082	0.411005296	-0.062943074	0.949891899	1.005507697	0.316451312	1.543352148	0.125422992	-0.295502259	0.768283436
GO_T cell activation (I) (M7.1)	-1.709196163	0.089218215	2.112658012	0.036211926	-3.023094867	0.002994964	-4.023902059	0.000101446	-1.228866466	0.222290235
GO_T cell activation (II) (M7.3)	-1.254315783	0.211429152	1.726155555	0.086286665	-1.465802716	0.145027349	-2.174521829	0.031661702	-0.427817618	0.669794665
GO_T cell activation (III) (M7.4)	-1.153009538	0.250506304	1.617462593	0.107785865	-3.468656607	0.000702357	-4.802060103	4.65E-06	-1.580905734	0.117369307
GO_T cell activation (IV) (M52)	0.23218284	0.81667203	1.031641041	0.3038269	-0.611340047	0.542002544	-1.73888092	0.084663762	-1.789876653	0.076799957
GO_T cell differentiation (M14)	-1.623969259	0.10621358	2.370456674	0.018980134	-3.588852131	0.000463566	-5.698363487	9.06E-08	-1.680066017	0.096374476
GO_T cell differentiation (Th2) (M19)	-1.348781159	0.179180399	1.925709809	0.055947868	-3.192016957	0.001757793	-5.086591125	1.39E-06	-1.442831872	0.152501208
GO_T cell surface signature (S0)	-0.926164308	0.355658288	1.844600577	0.06698002	-2.315217324	0.022109055	-3.527569079	0.000598456	-1.066848866	0.288862301
GO_T cell surface, activation (M36)	-0.377842341	0.706013584	2.522105179	0.012661725	-1.520616632	0.130694801	-0.008305089	0.993387598	-0.157071172	0.875536731
GO_targets of FOSL1/2 (M0)	1.965713082	0.050941598	-3.502722491	0.000600011	3.548459368	0.000533631	0.985201705	0.326540794	0.528152216	0.598679312
GO_TLR and inflammatory signaling (M16)	2.163510354	0.03188177	-0.36168774	0.7180717	1.65395797	0.100459436	2.39588384	0.018152188	0.120983365	0.903970949
GO_TLR8-BAFF network (M25)	1.358069619	0.176220377	-0.665370455	0.506789876	1.789939655	0.075705172	2.308773398	0.02269654	0.126124708	0.899911454
GO_translation initiation (M227)	0.173263682	0.862647902	0.51245458	0.609053087	1.344456383	0.18105557	-0.604307474	0.546799389	-0.393933766	0.694551515
GO_transmembrane transport (I) (M87)	1.804053066	0.072972699	0.075760453	0.939706131	1.910344947	0.05820946	1.553410684	0.123003075	0.503592254	0.615764854
GO_transmembrane transport (II) (M191)	-0.650433026	0.516280422	-0.504897722	0.61433864	-2.226565199	0.027633501	-2.380896196	0.01887136	-1.469320897	0.145194516
GO_type I interferon response (M127)	3.252107371	0.00137865	1.35297866	0.178007543	1.887739378	0.061207353	2.21552952	0.028642752	1.400975937	0.164622264
GO_Wnt signaling pathway (M206)	-0.509809322	0.610838581	-2.377938443	0.018612818	1.141202324	0.255806048	-0.970085145	0.333988296	0.498376289	0.619421285
GO_xenobiotic metabolism (M164)	0.019960833	0.984097754	-2.281437601	0.023866577	1.605480784	0.110724758	0.124482782	0.901144844	1.62354501	0.107932163
olink_IL8_P10145_OID00471	1.781818686	0.076652157	-1.434218591	0.153498665	6.563220042	1.04E-09	5.189762382	8.87E-07	3.590255905	0.00053496
olink_VEGFA_P15692_OID00472	2.24243115	0.026290489	-1.975411963	0.049974478	5.838060976	3.74E-08	3.354541112	0.001069546	4.08816721	9.36E-05
olink_CD8A_P01732_OID05124	1.250778296	0.212818831	3.146285755	0.001978694	2.629156097	0.009552536	0.64668392	0.519092428	0.47486321	0.636022165
olink_MCP-3_P80098_OID00474	3.361188589	0.000968105	-3.098359099	0.002306225	6.630435447	7.37E-10	6.409190899	3.13E-09	2.064605683	0.041806111
olink_GDNF_P39905_OID00475	0.697155182	0.486704931	0.376070789	0.707371959	1.09788697	0.27420816	2.643380234	0.00932326	0.144058367	0.88577293
olink_CDCP1_Q9H5V8_OID00476	0.248040595	0.804417124	-1.432166254	0.15408418	2.236945514	0.026929767	5.032157966	1.76E-06	1.264368809	0.209326496
olink_CD244_Q9BZW8_OID00477	-2.168622602	0.031569918	1.367818713	0.173323491	-0.025084212	0.980024834	0.170018492	0.865286745	0.160585162	0.87277609
olink_IL7_P13232_OID00478	0.429655107	0.668017469	-0.281364276	0.778801506	-0.117119084	0.906939748	1.466297044	0.14522727	-0.42133892	0.674501172
olink_OPG_O00300_OID00479	0.902237874	0.368270022	-0.371047723	0.711102187	2.254110328	0.025800378	3.760707055	0.000265182	3.176444284	0.002036155
olink_LAP TGF-beta-1_P01137_OID00480	0.458932827	0.646897559	-0.594626266	0.552949288	2.95788623	0.003658284	1.045348998	0.297998387	1.757277834	0.082233672
olink_uPA_P00749_OID00481	-1.012302587	0.312902951	1.526184251	0.128976	1.755810269	0.08138876	3.472072862	0.000722554	1.160860084	0.248735016
olink_IL6_P05231_OID00482	2.543310961	0.011917182	-3.089168873	0.002374495	6.326524417	3.42E-09	7.030454134	1.44E-10	2.423427689	0.01735373
olink_IL-17C_Q9P0M4_OID00483	-1.298924476	0.195815594	-0.863948032	0.38893443	0.934770896	0.351575408	0.245313747	0.806639642	-1.135808936	0.259019045
olink_MCP-1_P13500_OID00484	4.511119637	1.23E-05	-2.502150502	0.013368412	6.314132167	3.64E-09	3.651246469	0.000390338	3.307077818	0.001350772
olink_IL-17A_Q16552_OID00485	-0.032339123	0.974241419	0.681016845	0.496864037	-0.651162146	0.516048687	0.513089303	0.608848116	-1.620515122	0.10858196
olink_CXCL11_O14625_OID00486	3.772418374	0.000226345	-1.042159324	0.298939939	6.022868628	1.53E-08	4.40558713	2.34E-05	3.419540814	0.00094057
olink_AXIN1_O15169_OID00487	2.455032832	0.015144404	0.549800172	0.583237708	2.6649503	0.008638984	2.519883108	0.013075855	1.990865743	0.049495313
olink_TRAIL_P50591_OID00488	1.334730839	0.183837289	3.799560403	0.000206896	-0.464863088	0.642778414	-1.348271763	0.180153335	-0.71596797	0.475844376
olink_IL-20RA_Q9UHF4_OID00489	1.636199473	0.103739167	0.092406596	0.926492806	0.234031751	0.815314867	-0.359582335	0.719802203	-0.413604117	0.680137173
olink_CXCL9_Q07325_OID00490	2.201968739	0.029080601	-1.9714583	0.050429024	5.871830433	3.18E-08	4.724862282	6.41E-06	1.943910786	0.054995568
olink_CST5_P28325_OID00491	-0.283980519	0.776787941	-0.025074232	0.980027595	-0.219282678	0.826761051	0.70021467	0.485171522	0.215916627	0.829535979
olink_IL-2RB_P14784_OID00492	0.226601131	0.821019588	-0.081567607	0.935094454	-1.869810161	0.063676067	-0.170694653	0.864756208	-0.46995016	0.639514895
olink_IL-1 alpha_P01583_OID00493	0.092887222	0.92610793	-1.076905211	0.283174584	-0.392819129	0.695072649	0.756090774	0.451101566	-2.094521199	0.038993094
olink_OSM_P13725_OID00494	2.793770874	0.005838255	-1.289983	0.198953402	2.755517857	0.006669625	5.083587513	1.41E-06	1.540276262	0.126963284
olink_IL2_P60568_OID00495	0.044864007	0.96427096	0.794957347	0.427838433	0.39026801	0.696953476	-0.099591329	0.920837777	-2.475361272	0.015161337
olink_CXCL1_P09341_OID00496	2.206546854	0.028752514	-0.916793957	0.360656749	5.990034576	1.80E-08	3.230137567	0.001603231	1.822690722	0.071634271
olink_TSLP_Q969D9_OID00497	0.028404556	0.977374452	-1.280113857	0.202393286	0.8926061	0.373656479	2.178030001	0.031393037	-0.931322354	0.354151088
olink_CCL4_P13236_OID00498	2.234412092	0.026824127	-0.222422638	0.824273976	4.889277231	2.83E-06	3.862227164	0.000184004	3.36262579	0.001130761
olink_CD6_P30203_OID00499	-1.803023645	0.073243027	2.07009274	0.040081505	-2.636705669	0.009352904	0.639777722	0.523557329	-0.466775568	0.641776074
olink_SCF_P21583_OID00500	1.604055942	0.110649527	3.707613747	0.00028968	-2.959543108	0.003639878	-4.22941373	4.65E-05	-1.755428267	0.082551236
olink_IL18_Q14116_OID00501	-0.055064289	0.956155097	-0.524427369	0.60072097	2.682395084	0.008223027	2.329873965	0.02151236	3.007801649	0.003402433
olink_SLAMF1_Q13291_OID00502	-0.592368038	0.554430063	0.151240014	0.879980542	1.767832665	0.079347963	4.002776898	0.000109755	1.977232428	0.051041793
olink_TGF-alpha_P01135_OID00503	1.938607483	0.05428734	-0.938699355	0.349327003	1.888414018	0.061116047	3.63941861	0.000406799	0.111338315	0.911593279
olink_MCP-4_Q99616_OID00504	0.408296984	0.683594812	0.297014411	0.766848102	2.684789904	0.008167362	0.883454112	0.378787347	2.470661877	0.015348993
olink_CCL11_P51671_OID00505	0.985628223	0.32578536	-1.696705188	0.091734106	2.597206497	0.010440579	2.22520732	0.027968021	2.219043937	0.028970132
olink_TNFSF14_O43557_OID00506	1.745122841	0.082859668	-2.080096927	0.039141536	2.587329372	0.01072977	5.782831597	6.13E-08	2.473041207	0.015253723
olink_FGF-23_Q9GZV9_OID00507	0.423864184	0.672227136	0.79241432	0.429314868	-1.930562313	0.055633723	0.60433355	0.546782114	-0.856437848	0.394005285
olink_IL-10RA_Q13651_OID00508	0.232078788	0.816769731	0.532032872	0.595455296	-1.855848334	0.065655621	-0.712825079	0.477361249	-2.685603332	0.008604584
olink_FGF-5_P12034_OID00509	-0.700772732	0.484450159	0.469142086	0.639618907	0.727327477	0.468284826	0.743224042	0.458823234	-0.39088626	0.696794957
olink_MMP-1_P03956_OID00510	1.579107817	0.116261935	-1.159931383	0.247837648	1.840287553	0.067922057	0.340905859	0.733780681	0.028087111	0.977654179
olink_LIF-R_P42702_OID00511	0.452703755	0.651367754	-0.41015525	0.682251213	2.312545001	0.022260211	2.473392768	0.014807306	1.72699697	0.08756119
olink_FGF-21_Q9NSA1_OID00512	-1.13439811	0.258303369	-1.513402559	0.132187903	2.582454754	0.01087513	2.533450306	0.012605952	2.188106516	0.031223142
olink_CCL19_Q99731_OID00513	0.591599027	0.554943773	2.185709806	0.030318199	0.739859289	0.460670052	0.555196406	0.579811308	2.847128391	0.005452301
olink_IL-15RA_Q13261_OID00514	0.06241472	0.950309514	0.766506955	0.444525711	2.405533995	0.017503844	1.909454655	0.058631488	0.585459879	0.55968763
olink_IL-10RB_Q08334_OID00515	-1.112108403	0.267739179	2.198516513	0.029375593	-0.270113688	0.787485274	-0.173642069	0.862444299	0.718340785	0.474387507
olink_IL-22 RA1_Q8N6P7_OID00516	-0.796924702	0.426661176	-0.517020466	0.605869465	-2.111831319	0.036543285	0.776261827	0.439147575	-1.140601004	0.257028978
olink_IL-18R1_Q13478_OID00517	2.803803386	0.005667913	-1.700097721	0.091092707	3.113412855	0.002258337	4.208439648	5.04E-05	2.957131288	0.003955384
olink_PD-L1_Q9NZQ7_OID00518	3.025019266	0.002892085	0.205293623	0.83760866	5.347248279	3.71E-07	4.395243462	2.43E-05	2.724429664	0.007723554
olink_Beta-NGF_P01138_OID00519	-0.425914688	0.670735342	0.208896405	0.834799896	0.173692428	0.862367366	-0.031452588	0.974961741	-0.824143214	0.412013074
olink_CXCL5_P42830_OID00520	0.283135637	0.777434343	-0.245660008	0.806266277	1.651526973	0.100955276	2.907113484	0.004358524	1.373818057	0.172872931
olink_TRANCE_O14788_OID00521	-2.729018017	0.007054397	0.388364385	0.698272516	-2.73117261	0.007154382	-2.895642343	0.004509877	-1.766643524	0.080641042
olink_HGF_P14210_OID00522	1.782749871	0.076499755	-1.514478015	0.131915264	3.975687437	0.000113817	7.183426975	6.61E-11	3.300234206	0.0013805
olink_IL-12B_P29460_OID00523	-0.56147056	0.575252689	0.582416912	0.561121378	-0.590267161	0.555998319	2.919354393	0.004202168	1.781277738	0.078203548
olink_IL-24_Q13007_OID00524	1.400269719	0.16334488	0.638457301	0.524106273	-0.119016393	0.905439288	0.014509778	0.988447782	-1.202557998	0.232267111
olink_IL13_P35225_OID00525	-0.762294321	0.446992818	-0.714761556	0.475817848	1.03033755	0.304693984	0.276733	0.782469285	-3.211535591	0.001825579
olink_ARTN_Q5T4W7_OID00526	-0.48352187	0.629378133	2.176779934	0.030990884	-0.788450005	0.431815877	-0.573446836	0.567433481	-0.445791698	0.65680655
olink_MMP-10_P09238_OID00527	-1.030405801	0.304355473	1.991726548	0.048135326	0.315290912	0.753027631	-0.540723336	0.589717536	1.558628214	0.122555566
olink_IL10_P22301_OID00528	1.399449031	0.163590276	-0.498707202	0.618683663	2.582766257	0.010865789	1.356037479	0.177676524	-0.03047899	0.975751797
olink_TNF_P01375_OID05548	1.086102454	0.279047139	-0.279773896	0.780019237	2.563768959	0.011448871	3.683519164	0.000348571	2.00999159	0.047393257
olink_CCL23_P55773_OID00530	0.914760781	0.36167678	-2.731463948	0.007027388	4.211664448	4.60E-05	1.036135438	0.302257651	2.509713571	0.013850825
olink_CD5_P06127_OID00531	-1.735841481	0.084493234	0.592316462	0.554490781	-1.144873688	0.254287162	2.309669429	0.02264511	1.198912355	0.233674735
olink_CCL3_P10147_OID00532	2.588173935	0.01052565	-1.033873559	0.302785183	6.444840713	1.89E-09	5.126291359	1.17E-06	2.864840167	0.005180567
olink_Flt3L_P49771_OID00533	-0.241095007	0.809786354	0.346397774	0.729507598	-0.562213593	0.574902818	0.217592347	0.828122559	-0.142175423	0.88725575
olink_CXCL6_P80162_OID00534	1.212908578	0.226930464	1.001934309	0.31791705	5.40106224	2.90E-07	1.619953721	0.107911725	2.043035632	0.043941189
olink_CXCL10_P02778_OID00535	2.892873606	0.004342635	-2.095511894	0.037730199	5.74861203	5.73E-08	6.540283174	1.65E-09	3.745147433	0.000315813
olink_4E-BP1_Q13541_OID00536	2.984631739	0.003279368	-1.542443591	0.124979036	3.730409818	0.000280558	3.630038447	0.000420318	2.140633995	0.034977378
olink_IL-20_Q9NYY1_OID00537	-0.304239107	0.761336182	-0.855601522	0.393522096	-0.38046016	0.704201833	0.651432027	0.516034338	-1.093475216	0.277071359
olink_SIRT2_Q8IXJ6_OID00538	0.410968178	0.681638976	-1.403125369	0.162554042	1.435397718	0.153486664	1.745437292	0.083511804	1.523511541	0.131098535
olink_CCL28_Q9NRJ3_OID00539	-1.004380083	0.316693296	0.151091349	0.880097616	-0.416635158	0.677606981	-0.078739393	0.937373282	-0.833602126	0.40668797
olink_DNER_Q8NFT8_OID01213	-1.173129841	0.242465744	1.263196434	0.208391288	-3.207204239	0.00167385	-2.818206709	0.005664355	-1.915198086	0.0586078
olink_EN-RAGE_P80511_OID00541	1.376639825	0.170523246	-0.988031332	0.324657556	2.839245501	0.005221741	4.458899949	1.89E-05	1.849738926	0.067596876
olink_CD40_P25942_OID00542	0.756166607	0.450647491	-1.43050866	0.154558328	5.09877907	1.13E-06	3.127591834	0.002220121	3.14035583	0.002276183
olink_IL33_O95760_OID00543	-0.855885739	0.393325132	-0.640719328	0.522639147	0.269226765	0.788166227	0.731490633	0.465929704	-1.367347283	0.174884383
olink_IFN-gamma_P01579_OID05547	2.225482221	0.027429462	-1.946313747	0.053402439	3.880069856	0.000162563	4.294703598	3.61E-05	1.664067752	0.099538898
olink_FGF-19_O95750_OID00545	-0.533154435	0.594657338	-0.222287033	0.824379347	-2.404562143	0.017548487	-1.405644411	0.162457297	-0.52836184	0.598534427
olink_IL4_P05112_OID00546	-0.364460344	0.715989574	1.006707498	0.315624391	-0.677692336	0.499126596	1.529080394	0.128920838	-1.101127326	0.273745313
olink_LIF_P15018_OID00547	0.20262805	0.839680023	0.340803997	0.733706762	-0.526447239	0.599441369	2.295127798	0.023492547	-0.426821645	0.670517348
olink_NRTN_Q99748_OID00548	-0.235037881	0.814476162	-1.020476766	0.309072305	0.231029226	0.817641868	-0.525447426	0.600258176	-1.295094307	0.198563796
olink_MCP-2_P80075_OID00549	3.644433154	0.000360533	0.434466681	0.664546119	5.265617511	5.37E-07	1.816000674	0.071909166	2.208069393	0.029752523
olink_CASP-8_Q14790_OID00550	2.02572548	0.044434086	-2.26773664	0.024709178	5.150036742	9.02E-07	2.867423254	0.004902953	1.00796214	0.316145329
olink_CCL25_O15444_OID00551	1.631997237	0.104622419	-4.369285219	2.26E-05	1.201133931	0.231802361	0.994158263	0.322180101	0.67683832	0.500225453
olink_CX3CL1_P78423_OID00552	2.503203	0.01329825	0.791296196	0.429964976	2.478509932	0.014426235	0.375922995	0.707649133	1.3438929	0.182324181
olink_TNFRSF9_Q07011_OID00553	-1.673290623	0.096199989	2.212700955	0.028361389	0.427078351	0.670002621	-0.90927823	0.365056757	-0.19597279	0.845068422
olink_NT-3_P20783_OID00554	0.428677004	0.668727759	-0.909605915	0.364424666	0.659427348	0.510744712	0.215039966	0.830107375	-0.493478268	0.622863573
olink_TWEAK_O43508_OID00555	-2.634919876	0.009232589	2.6454713	0.008987407	-4.31519235	3.06E-05	-2.614003916	0.010114928	-2.203597477	0.030076592
olink_CCL20_P78556_OID00556	1.294427468	0.197359884	-3.685186525	0.000314177	3.754155246	0.000257547	6.135616081	1.17E-08	2.21375843	0.029344668
olink_ST1A1_P50225_OID00557	1.747286762	0.082482544	0.128883396	0.897614873	-0.256730823	0.797777422	0.215388697	0.829836125	-1.066426428	0.289052099
olink_STAMBP_O95630_OID00558	1.767468946	0.079032438	-1.662420493	0.098423715	4.268072353	3.69E-05	2.850143646	0.005158893	2.107998796	0.037780134
olink_IL5_P05113_OID00559	0.071898833	0.942771106	2.2191008	0.027913854	-1.462461009	0.145939037	-1.707628093	0.090335094	-2.577939137	0.011545487
olink_ADA_P00813_OID00560	1.243551576	0.215461194	-1.746704051	0.082644322	1.159815635	0.248171008	3.470576361	0.000726214	1.759023444	0.081934882
olink_TNFB_P01374_OID00561	-1.470684858	0.143316025	1.14301918	0.254770609	-3.162259018	0.001933731	-1.5663241	0.119950634	-0.986745679	0.32638372
olink_CSF-1_P09603_OID00562	3.38786804	0.000884332	-0.786544018	0.432734453	5.080684782	1.23E-06	4.170468814	5.83E-05	3.291570635	0.001419013
olink_PPP1R9B_Q96SB3_OID00936	2.542273663	0.011951218	0.178289191	0.858725713	2.36181521	0.019614672	2.913380928	0.004277813	3.240902927	0.001665173
olink_GLB1_P16278_OID00937	0.92607016	0.355787048	-1.322573809	0.187900479	1.616940277	0.108225527	0.530047262	0.597075136	1.578449502	0.117932391
olink_PSIP1_O75475_OID00938	0.303754726	0.761704541	-3.253024228	0.001398019	2.39396302	0.018041961	2.133713974	0.034936528	4.385977836	3.10E-05
olink_ZBTB16_Q05516_OID00939	2.195542591	0.029546609	-1.377853265	0.170209329	3.13079864	0.002137415	1.113783386	0.267635703	0.874878949	0.383943027
olink_IRAK4_Q9NWZ3_OID00940	-0.942956481	0.347107279	1.617262832	0.107828999	0.378430237	0.705705446	0.36884094	0.712907243	0.512697994	0.60940488
olink_TPSAB1_Q15661_OID00941	-1.792448611	0.0749272	-1.840723901	0.067549685	-0.97360657	0.331993214	-0.60364146	0.547240698	0.052443056	0.95829062
olink_HCLS1_P14317_OID00942	1.900250974	0.059176581	-2.644893735	0.009002092	3.337238945	0.001093432	5.125099711	1.18E-06	3.205409829	0.001860808
olink_CNTNAP2_Q9UHC6_OID00943	-3.341225758	0.001035578	0.723675964	0.470341567	-1.336447314	0.183651236	-0.585351639	0.559429059	0.479381758	0.632817135
olink_CLEC4G_Q6UXB4_OID00944	1.128491997	0.260780621	2.186851169	0.030233139	-0.00705262	0.994383281	-0.109792442	0.912760489	1.048655458	0.297113875
olink_IRF9_Q00978_OID00945	0.592001993	0.554674557	-0.767644394	0.443851443	0.998511788	0.319817643	1.956070386	0.052819897	2.064664533	0.04180041
olink_EDAR_Q9UNE0_OID00946	-0.349449479	0.727205728	-0.231761519	0.817025046	1.178345742	0.240731655	1.010173169	0.314479261	2.138098017	0.035188515
olink_IL6_P05231_OID00947	2.458739407	0.014994654	-3.455106434	0.000707547	6.952342512	1.40E-10	7.708532756	4.42E-12	3.116104843	0.002452009
olink_DGKZ_Q13574_OID00948	0.408640174	0.683343409	2.00577231	0.046598239	1.204325317	0.230571084	-0.440774306	0.660182866	-0.755993495	0.451605671
olink_CLEC4C_Q8WTT0_OID00949	-0.178186015	0.858799517	3.831776769	0.000183622	-1.467843614	0.144472723	-3.502783066	0.00065117	-1.590656987	0.115154995
olink_IRAK1_P51617_OID00950	2.208003792	0.028648781	-1.542228957	0.125031156	3.831395667	0.000194455	5.095513664	1.34E-06	2.772622033	0.006744567
olink_CLEC4A_Q9UMR7_OID00951	-0.794639911	0.427985592	-0.281766185	0.778493857	-2.513788854	0.013119266	-2.577122151	0.011194451	0.26139393	0.794379435
olink_PRDX1_Q06830_OID00952	2.575469708	0.010904096	-2.655528096	0.008735136	5.036435666	1.49E-06	5.076604089	1.45E-06	3.134529095	0.002317323
olink_PRDX3_P30048_OID00953	1.680683681	0.094751489	-2.250228905	0.025823676	1.232202973	0.220015053	1.356659055	0.177479392	0.154638027	0.87744915
olink_FGF2_P09038_OID00954	0.416109221	0.677880811	0.6993848	0.485346466	-1.152966404	0.250961548	0.143246518	0.886339822	-0.404087654	0.687096363
olink_PRDX5_P30044_OID00955	3.807927746	0.000198506	-2.234061419	0.02689158	5.315541351	4.28E-07	5.669857883	1.03E-07	3.379343277	0.001071444
olink_DPP10_Q8N608_OID00956	-2.593885177	0.010359393	-0.013105876	0.989559963	-0.665123016	0.507106503	0.092445356	0.926500972	-0.393037286	0.695211183
olink_TRIM5_Q9C035_OID00957	2.629554304	0.009373368	-1.893133436	0.060180138	2.745840444	0.006858628	3.469120187	0.000729793	3.073255914	0.002793898
olink_DCTN1_Q14203_OID00958	0.568162508	0.570711297	-0.449159178	0.653936235	2.627538451	0.009595808	2.165530267	0.032359437	2.019885735	0.046336099
olink_ITGA6_P23229_OID00959	-0.787761122	0.431987547	-0.559917037	0.576334029	-0.587453361	0.557880543	0.198814924	0.842749675	-0.660909329	0.510340219
olink_CDSN_Q15517_OID00960	-0.468903478	0.639769025	0.280927793	0.77913566	-0.12007454	0.904602615	-2.561981746	0.011666836	-0.775467784	0.44007388
olink_GALNT3_Q14435_OID00961	0.543430745	0.587580267	-0.351461916	0.725713071	0.546499919	0.585624445	0.274186767	0.784420509	0.024285394	0.980678139
olink_FXYD5_Q96DB9_OID00962	0.998385186	0.319581545	-0.191443235	0.848425714	1.192441203	0.235180045	1.525144111	0.12989896	1.180474763	0.240887873
olink_TRAF2_Q12933_OID00963	1.083481779	0.280204588	-0.214781046	0.830216762	1.96704033	0.051229113	1.942133366	0.054504035	1.691205315	0.09421984
olink_TRIM21_P19474_OID00964	1.156392321	0.249223178	-3.20972252	0.00161126	2.233491699	0.027162162	4.458453105	1.89E-05	2.979129035	0.003705854
olink_LILRB4_Q8NHJ6_OID00965	3.311827561	0.001142975	-2.452216929	0.015293301	6.487220391	1.53E-09	6.20838165	8.25E-09	5.86051559	7.30E-08
olink_NTF4_P34130_OID00966	-1.48177414	0.140342921	-0.305682648	0.760251218	-1.66390568	0.098450859	1.091498976	0.277277027	0.596983863	0.552000599
olink_KRT19_P08727_OID00967	0.91105124	0.363622005	-3.514416204	0.000576058	6.804150312	3.02E-10	3.76292101	0.000263095	2.681657721	0.008699046
olink_ITM2A_O43736_OID00968	-1.792920322	0.074851402	0.839685826	0.40236138	2.465744743	0.014927016	1.115292283	0.26699142	3.067659375	0.002841685
olink_HNMT_P50135_OID00969	0.437814087	0.66210423	-3.217225653	0.001572268	2.850552769	0.005049926	6.241258439	7.05E-09	4.324993502	3.90E-05
olink_CCL11_P51671_OID00970	1.684694832	0.093973008	-2.077432461	0.039390018	2.256840983	0.025624582	2.348249743	0.020525827	2.203275595	0.030100036
olink_MILR1_Q7Z6M3_OID00971	-1.529953584	0.127978547	-2.113296377	0.03615643	-0.347472309	0.728777654	3.36343768	0.001038603	2.570741507	0.011771213
olink_EGLN1_Q9GZT9_OID00972	1.590875769	0.113587066	-2.073528166	0.039756564	2.012427643	0.046164218	3.264914913	0.001433248	2.785236193	0.00650776
olink_NFATC3_Q12968_OID00973	-1.31291838	0.191067237	-0.706330649	0.481029417	-0.564617966	0.573270601	-0.714867645	0.476102771	0.795122591	0.428611203
olink_LY75_O60449_OID00974	-0.105863204	0.91582186	0.70111457	0.484269387	-1.261894664	0.209162534	-0.943417598	0.34739495	1.148161451	0.25391123
olink_EIF5A_P63241_OID00975	-2.041813511	0.042791914	0.591399839	0.555103095	-1.44547522	0.150641833	-2.194970142	0.030123409	-1.05520149	0.294126672
olink_EIF4G1_Q04637_OID00976	1.949012675	0.053021228	-2.368604992	0.019072024	7.117711842	5.87E-11	4.380542475	2.58E-05	4.332124896	3.80E-05
olink_CD28_P10747_OID00977	0.080575005	0.9358794	-1.726185257	0.086281307	-1.187313288	0.237189015	2.004361617	0.047321186	1.195583664	0.23496534
olink_PTH1R_Q03431_OID00978	-1.68978097	0.092993346	0.444439563	0.657336849	0.94931382	0.34415737	-0.230902269	0.817790603	0.67586892	0.500837909
olink_BIRC2_Q13490_OID00979	-0.550022613	0.583061398	0.659880395	0.510297465	1.001990149	0.318140956	0.863572481	0.38957471	1.153122303	0.251880088
olink_HSD11B1_P28845_OID00980	0.989633885	0.323828918	-0.898371761	0.370363068	1.61868037	0.107850004	-0.542802294	0.588289724	2.698572762	0.008300613
olink_NF2_P35240_OID00981	-0.595748067	0.552174949	1.946559245	0.053372708	-1.522456977	0.130233597	-1.226202673	0.222563781	-1.910715789	0.059189394
olink_PLXNA4_Q9HCM2_OID00982	0.161383176	0.871992707	0.2485211	0.804056031	-1.165020103	0.246065312	-0.811909461	0.418478421	0.532679137	0.595554087
olink_SH2B3_Q9UQQ2_OID00983	2.284572454	0.02363568	1.241036013	0.216443593	1.928101385	0.055942028	0.187321237	0.851730484	1.391552787	0.167450218
olink_FCRL3_Q96P31_OID00984	-1.046175985	0.297038236	0.480174227	0.631771847	0.122434049	0.902737347	-2.096936172	0.038134891	1.458675756	0.148097416
olink_CKAP4_Q07065_OID00985	1.710457567	0.089095604	-1.330181748	0.185387443	6.201279981	6.38E-09	5.449441835	2.81E-07	4.310971377	4.11E-05
olink_JUN_P05412_OID00986	2.944942722	0.003705885	-0.052897555	0.957880779	3.511922406	0.000605494	2.05164819	0.042417	3.826517391	0.000238104
olink_HEXIM1_O94992_OID00987	3.281592599	0.001264201	-2.877301039	0.004569441	5.904562322	2.72E-08	4.686266549	7.52E-06	4.088620404	9.35E-05
olink_CLEC4D_Q8WXI8_OID00988	1.462312452	0.14559285	-2.008335546	0.046322281	1.869162211	0.06376682	4.718924994	6.57E-06	2.550309484	0.012433822
olink_PRKCQ_Q04759_OID00989	0.46692702	0.641179459	1.876663693	0.062419881	-1.589047613	0.114388893	-0.297529465	0.76658549	0.57606303	0.565994588
olink_MGMT_P16455_OID00990	-0.27474986	0.783858495	-1.424317779	0.156339102	2.412636896	0.01718061	4.303633966	3.49E-05	3.11835506	0.002435178
olink_TREM1_Q9NP99_OID00991	0.602802452	0.54748304	-2.863101392	0.004768475	3.280434727	0.001318942	5.299090124	5.49E-07	2.480247336	0.014968407
olink_CXADR_P78310_OID00992	-1.00780698	0.315050059	-1.428993263	0.154992779	-0.032873978	0.973823638	-1.567849029	0.119594176	0.987512585	0.326009861
olink_IL10_P22301_OID00993	0.376251961	0.707221885	-2.275378225	0.024236071	4.254086254	3.90E-05	2.860146461	0.005009283	2.108151668	0.037766565
olink_SRPK2_P78362_OID00994	1.30528377	0.193647072	-1.664727431	0.097961574	2.814650039	0.005614055	3.040581788	0.00290939	1.848046108	0.067843852
olink_KLRD1_Q13241_OID00995	0.138596506	0.889941139	-0.222560466	0.824166881	3.17424306	0.001860998	2.109691691	0.03699815	2.520414335	0.013463887
olink_BACH1_O14867_OID00996	2.535259517	0.01218366	-0.722699428	0.470939751	3.686902672	0.000327859	4.96300177	2.36E-06	4.04449081	0.00010971
olink_PIK3AP1_Q6ZUJ8_OID00997	0.106418191	0.915382226	-1.757911993	0.080711282	2.208120772	0.02892356	3.464539048	0.000741158	0.777710818	0.438756773
olink_SPRY2_O43597_OID00998	-0.60931553	0.543168898	-0.453351672	0.650921495	0.968035323	0.334757791	0.937709261	0.350309173	2.255433678	0.026503224
olink_STC1_P52823_OID00999	1.868605617	0.06348325	-2.977197095	0.003370428	3.571271404	0.000492922	5.772279357	6.44E-08	3.762041655	0.000297919
olink_ARNT_P27540_OID01000	1.922732867	0.05626797	-0.785650655	0.433256249	-1.124823942	0.262659576	-0.838537453	0.403424348	0.856137514	0.394170492
olink_FAM3B_P58499_OID01001	-0.395887847	0.692708664	0.491448306	0.623795746	-2.170220219	0.031739838	-3.658198195	0.00038096	-1.612398511	0.110338178
olink_SH2D1A_O60880_OID01002	-0.222112658	0.824505947	-0.543151427	0.587795858	1.329366381	0.185969228	0.513398648	0.60863242	1.39203757	0.167303832
olink_ICA1_Q05084_OID01003	0.677809534	0.498859392	-1.291959298	0.198269779	2.040340206	0.043266165	0.827845206	0.409429319	1.850226886	0.067525824
olink_DFFA_O00273_OID01004	2.484234741	0.013999808	-2.58339057	0.010695372	5.067532486	1.30E-06	6.254228992	6.62E-09	3.895269688	0.000187005
olink_DCBLD2_Q96PD2_OID01005	-1.51059889	0.132838768	-2.561438474	0.011365768	0.149228367	0.881596134	0.282504863	0.778051352	0.813216743	0.41821642
olink_FCRL6_Q6DN72_OID01006	-1.336338957	0.183312468	0.253947447	0.799868432	-0.691512262	0.490431172	2.354845946	0.02018157	1.240945678	0.217815429
olink_NCR1_O76036_OID01007	-0.401758785	0.688391076	-0.068842709	0.945202423	1.165271648	0.24596386	-0.317896348	0.751125447	1.66368872	0.09961488
olink_CXCL12_P48061_OID01008	-0.780928676	0.435984117	0.473408134	0.636579613	0.139357649	0.88937522	0.366706325	0.714494828	0.30657679	0.7598659
olink_AREG_P15514_OID01009	0.350607122	0.726338595	-3.454210095	0.000709735	5.022254114	1.59E-06	3.595871112	0.000473241	0.947545162	0.345870525
olink_IFNLR1_Q8IU57_OID01010	1.029384339	0.304833554	-1.650476391	0.100844619	2.089788697	0.038513059	3.144232299	0.002106945	1.438316875	0.153774518
olink_DAPP1_Q9UN19_OID01011	0.847881751	0.397754811	-0.133328856	0.894104051	2.726667432	0.007247519	1.360277492	0.176335089	0.194802809	0.845981581
olink_PADI2_Q9Y2J8_OID01012	-0.032190493	0.974359764	-0.149420685	0.88141346	0.095741299	0.923868014	1.701935994	0.091400623	-0.016210669	0.987101813
olink_SIT1_Q9Y3P8_OID01013	-1.370876152	0.172309819	0.206742591	0.836478777	0.22662159	0.82106079	1.831757602	0.069509718	0.349792328	0.727302805
olink_MASP1_P48740_OID01014	-1.121097832	0.263905336	-1.926137861	0.055893966	-2.450660638	0.015538685	-0.784362092	0.434399441	0.00351343	0.997204385
olink_LAMP3_Q9UQV4_OID01015	2.898610003	0.004267876	-1.24127355	0.216356098	3.386102901	0.000928833	1.034752697	0.30290039	3.539137022	0.000634613
olink_CLEC7A_Q9BXN2_OID01016	-0.108824446	0.913476411	2.767690017	0.006324587	-0.157001066	0.875478571	-0.227594743	0.820355186	1.280004487	0.203797029
olink_CLEC6A_Q6EIG7_OID01017	-1.077800314	0.282725159	0.519695412	0.604007825	0.802072905	0.423920422	1.735215613	0.08531341	3.907643376	0.000178999
olink_DDX58_O95786_OID01018	3.382453511	0.000900765	-4.519851165	1.21E-05	6.768101969	3.64E-10	4.767466267	5.37E-06	5.151218335	1.49E-06
olink_IL12RB1_P42701_OID01019	0.263576259	0.792441419	-0.80837219	0.420099564	4.961946213	2.06E-06	4.417591116	2.23E-05	2.589339897	0.011195929
olink_TANK_Q92844_OID01020	0.61093278	0.542100316	-0.879505439	0.380471466	-0.81109069	0.418741252	-0.939842224	0.349218419	0.033236291	0.973558951
olink_ITGA11_Q9UKX5_OID01021	-0.393867388	0.694196887	1.596322705	0.112427657	-2.952130343	0.003722894	-2.521896776	0.013005134	-1.346968747	0.181335134
olink_KPNA1_P52294_OID01022	-1.941509382	0.0539317	0.253654453	0.800094394	-1.367782445	0.173652765	-3.560375098	0.000534851	-0.394544831	0.694102001
olink_LAG3_P18627_OID01023	2.482010207	0.014084208	-0.006566082	0.994769398	3.066952687	0.002613264	2.359387209	0.019947536	3.072434084	0.002800868
olink_IL5_P05113_OID01024	0.118286165	0.905987458	1.2795536	0.202589867	-0.779525716	0.437034534	-1.69003681	0.093661139	-1.381364788	0.170549284
olink_CD83_Q01151_OID01025	-1.357875886	0.17639136	-2.03359784	0.043676078	-0.142050789	0.887251663	1.498153685	0.136763726	2.527466963	0.013214203
olink_ITGB6_P18564_OID01026	-0.497288537	0.619659854	-1.018201003	0.310148918	1.445737436	0.150568357	0.779030794	0.437521103	0.042350893	0.966311761
olink_BTN3A2_P78410_OID01027	1.310106625	0.19201438	-2.222259561	0.027695239	5.182088491	7.82E-07	3.27409409	0.001391275	2.921644878	0.004390808
